# Supplementary material for: Tunable electroactive oligothiophene-naphthalimide semiconductors via end-capped engineering: cumulative effects beyond the linker
Source: Royal Society of Chemistry journal article supplement (doi:10.1039/d3tc02099a), 2023-01-01
Supplement: d3tc02099a1.pdf [file d3tc02099a1.pdf]

## Supplementary information

### *Tunable electroactive oligothiophene-naphthalimide semiconductors via end-capped engineering: Cumulative effects beyond the linker*

Matías J. Alonso-Navarro,<sup>a,b, †</sup> Alexandra Harbuzaru,<sup>c, †</sup> Raúl González-Núñez,<sup>c</sup> M. Mar Ramos,<sup>b</sup> José L. Segura,<sup>a\*</sup> Rocío Ponce Ortiz.<sup>c\*</sup>

<sup>a</sup> *Department of Organic Chemistry, Complutense University of Madrid, Faculty of Chemistry, Madrid 28040, Spain.*

<sup>b</sup> *Chemical and Environmental Technology Department. Univ. Rey Juan Carlos, Móstoles, 28933, Spain.*

<sup>c</sup> *Department of Physical Chemistry, University of Málaga, Málaga, 29071, Spain.*

<sup>†</sup>These authors contributed equally to this work.

#### **General contents**

1. General information
2. Synthesis of compounds and characterization
3. DFT and TD-DFT calculations
4. FT-Raman
5. UV-Vis and Electrochemical data
6. Spectroelectrochemical measurements
7. References

## 1. General Information

All the chemicals were purchased from commercial suppliers and used without further purification. **NIA** and **1** compounds were obtained as previously described.<sup>1,2</sup> <sup>1</sup>H-NMR and <sup>13</sup>C-NMR spectra were recorded on a Bruker Avance 300 MHz and AMX 500 spectrometers. Chemical shifts are reported in ppm and referenced to the residual non-deuterated solvent frequencies (CDCl<sub>3</sub>: δ 7.26 ppm for <sup>1</sup>H, δ 77.0 ppm for <sup>13</sup>C, TFA-*d*: δ 11.50 ppm for <sup>1</sup>H, δ 164.2 and 116.6 ppm for <sup>13</sup>C). UV-vis absorption spectra of the compounds in HPLC chloroform solutions at 20 °C were recorded on a Varian Cary 50 UV-vis spectrophotometer. Mass spectra were recorded on a Bruker Reflex 2 (MALDI-TOF). FTIR spectra were carried out in a Shimadzu FTIR 8300 spectrophotometer. Cyclic voltammograms were recorded in an inert atmosphere in electrochemical workstation at a scan rate of 100 mV·s<sup>-1</sup> at 20 °C using tetrabutylammonium hexafluorophosphate (TBAPF<sub>6</sub>, 0.1 mol L<sup>-1</sup>) as supporting electrolyte in dichloromethane. Polymer-precoated platinum electrode, platinum-wire electrode, and Ag/Ag<sup>+</sup> electrode were used as working electrode, an auxiliary electrode, and reference electrode, respectively. Potentials were recorded versus Fc/Fc<sup>+</sup>.

## 2. Synthesis of compounds and characterization

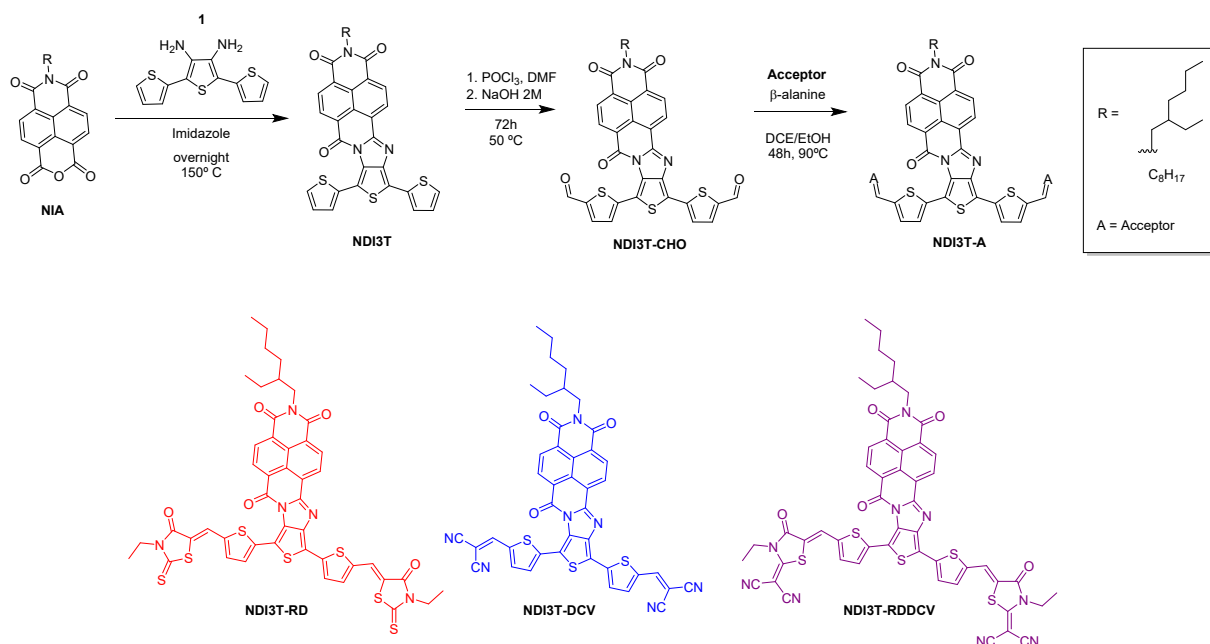

**Scheme S1.** Synthetic pathway for the novel A2-D-A1-D-A2 derivatives obtained in this work based on terthiophene-naphthalimide assemblies.

**NDI3T**: A mixture of **NIA** (339.3 mg; 0.9 mmol), **1** (226.4 mg, 0.81 mmol) and imidazole (9 g, 123 mmol) is heated at 150°C overnight. After the reaction time is completed, the crude is cooled and then poured into 200mL of HCl 18%. The mixture is extracted five times with DCM (5x25mL) and the organic phases were mixed, dried over anhydrous MgSO<sub>4</sub>, filtered and the solvent is removed under reduce pressure. The crude solid was then purified by chromatography column (silica gel flash, dichloromethane) to obtain 277 mg (55%) of a green solid.

<sup>1</sup>H-NMR (300 MHz, CDCl<sub>3</sub>) δ (ppm) = 8.85 (d, *J* = 7.7 Hz, 1H), 8.74 (d, *J* = 3.3 Hz, 1H), 8.71 (d, *J* = 3.3 Hz, 1H), 8.66 (d, *J* = 7.7 Hz, 1H), 7.54 – 7.49 (m, 2H), 7.38 (dd, *J* = 5.0, 3.0 Hz, 1H), 7.26 (d, *J* = 3.0 Hz, 1H), 7.20 (dd, *J* = 5.0, 3.0 Hz, 1H), 7.11 (dd, *J* = 5.0, 3.0 Hz, 1H), 4.21 – 4.05 (m, 2H), 2.00 – 1.90 (m, 1H), 1.48 – 1.26 (m, 8H), 1.00 – 0.88 (m, *J* = 15.8, 7.2 Hz, 6H).

<sup>13</sup>C- NMR (75 MHz, CDCl<sub>3</sub>) δ (ppm) = 163.34, 163.09, 156.81, 145.42, 143.28, 140.59, 133.52, 132.94, 131.26, 130.91, 130.78, 130.71, 128.01, 127.59, 127.13, 127.02, 126.92, 126.34, 125.45, 125.40, 124.79, 44.69, 38.18, 30.88, 28.80, 24.18, 23.25, 14.28, 10.75.

MALDI-HRMS (m/z) calc. for C<sub>34</sub>H<sub>27</sub>N<sub>3</sub>O<sub>3</sub>S<sub>3</sub>: 621.1215, found (M<sup>+</sup>): 621.1193.

FTIR (ATR, CHCl<sub>3</sub>) ν (cm<sup>-1</sup>) = 2958, 2924, 2854, 1707, 1666, 1463, 1376, 1338, 1297, 1263, 1241, 1071, 761, 689, 591.

m.p.: 264-265 °C.

**NDI3T-CHO**: To a solution of **NDI3T** (126mg, 0,2 mmol) in 15 mL of chloroform, DMF was added in excess (1 mL) and the solution was stirred for 5min. After that, POCl<sub>3</sub> (1 mL) was added carefully and the reaction was stirred at 50 °C for 48h. 1M NaOH (30 mL) was added, the mixture was stirred vigorously, and the phases were separated. The aqueous phase was extracted with dichloromethane and the combined organic phases were washed with water and brine and dried over MgSO<sub>4</sub>. The solvent was evaporated under reduced pressure and the crude was purified by chromatography column (silica gel flash, chloroform) to provide 115 mg (83%) as greenish pure product.

<sup>1</sup>H- NMR (300 MHz, CDCl<sub>3</sub>) δ (ppm) = 9.99 (s, 1H), 9.95 (s, 1H), 8.97 (d, *J* = 7.6 Hz, 1H), 8.81 – 8.73 (m, 3H), 7.83 (d, *J* = 3.9 Hz, 1H), 7.76 (d, *J* = 3.9 Hz, 1H), 7.66 (d, *J* = 3.8 Hz, 1H), 7.36 (d, *J* = 3.8 Hz, 1H), 4.15 – 4.13 (m, 2H), 1.98 – 1.91 (m, 1H), 1.36 (m, 8H), 0.92 (m, 6H).

<sup>13</sup>C- NMR (75 MHz, CDCl<sub>3</sub>) δ (ppm) = 182.84, 182.54, 163.06, 162.86, 157.03, 155.75, 147.88, 145.95, 144.77, 143.47, 142.32, 142.17, 136.80, 135.67, 131.50, 131.29, 131.15, 130.21,

127.71, 127.57, 127.38, 126.62, 126.22, 126.10, 125.46, 125.17, 121.82.

MALDI-HRMS (m/z) calc. for  $C_{36}H_{27}N_3O_5S_3$ : 677.1113, found ( $M^+$ ): 677.1166.

FTIR (ATR,  $CHCl_3$ )  $\nu$  ( $cm^{-1}$ ) = 2960, 2923, 2854, 1709, 1665, 1445, 1382, 1335, 1258, 1219, 1068, 827, 760, 672, 591.

m.p.: 235-236 °C.

#### General procedure for the synthesis of the end-capped derivatives:<sup>3</sup>

To a solution of the corresponding dialdehyde derivative **NDI3T-CHO** (1eq) in 21 mL of a mixture of DCE/EtOH (5:2),  **$\beta$ -Alanine** (1.75eq) and the **acceptor** (3,25eq) were added, and the mixture was stirred under reflux for 48h. The solvent was removed under reduced pressure and the residue was redissolved in DCM and precipitated in MeOH.

**NDI3T-RD**: The solid was filtered and washed with water, MeOH and hot MeOH to obtain the product 30 mg (45 %) as a black-red material.

$^1H$ - NMR (300 MHz,  $CDCl_3$ )  $\delta$  (ppm) = 9.03 (d,  $J$  = 7.7 Hz, 1H), 8.87 – 8.72 (m, 3H), 7.90 (s, 1H), 7.85 (s, 1H), 7.69 (d,  $J$  = 4.0 Hz, 1H), 7.47 (d,  $J$  = 4.0 Hz, 1H), 7.40 (d,  $J$  = 4.0 Hz, 1H), 7.32 (d,  $J$  = 4.0 Hz, 1H), 4.28 – 4.09 (m, 6H), 2.01 – 1.91 (m, 1H), 1.44 – 1.24 (m, 14H), 0.93 – 0.81 (m, 6H).

$^{13}C$ - NMR (175 MHz,  $CDCl_3$ )  $\delta$  (ppm) = 191.73, 191.53, 191.47, 167.17, 162.96, 162.79, 157.24, 156.91, 156.28, 155.34, 150.27, 149.69, 148.76, 147.41, 144.06, 143.85, 140.65, 140.30, 139.33, 138.49, 138.06, 136.59, 135.50, 134.98, 133.97, 132.28, 131.94, 131.54, 131.16, 130.58, 129.99, 129.70, 128.14, 127.80, 127.63, 127.35, 126.81, 126.33, 126.20, 125.29, 125.04, 124.59, 121.79, 121.44, 114.01, 113.58, 113.08, 44.66, 40.05, 37.95, 31.90, 30.66, 28.59, 27.07, 23.98, 23.04, 14.09, 12.30, 10.56.

MALDI-HRMS (m/z) calc. for  $C_{46}H_{37}N_5O_5S_7$ : 963.0840, found ( $M^+$ ): 963.049.

FTIR (ATR,  $CHCl_3$ )  $\nu$  ( $cm^{-1}$ ) = 2959, 2923, 2853, 1708, 1667, 1579, 1463, 1432, 1375, 1328, 1258, 1235, 1131, 1094, 1014, 825, 798, 760, 682, 598.

m.p.: 308-309 °C.

**NDI3T-DCV:** The solid was filtered and washed with water, MeOH and hot MeOH to obtain the product 35 mg (60 %) as a black-red material.

<sup>1</sup>H- NMR (300 MHz, CDCl<sub>3</sub>/TFA-*d*) δ (ppm) = 8.96 (d, *J* = 7.8 Hz, 1H), 8.81 – 8.68 (m, 3H), 7.85 – 7.78 (m, 3H), 7.77 – 7.72 (m, 2H), 7.34 (d, *J* = 4.1 Hz, 1H), 4.12 – 3.97 (m, 2H), 1.96 – 1.80 (m, 1H), 1.37 – 1.19 (m, 8H), 0.90 – 0.72 (m, 6H).

MALDI-HRMS (m/z) calc. for C<sub>42</sub>H<sub>27</sub>N<sub>7</sub>O<sub>3</sub>S<sub>3</sub>: 773.1337, found (M<sup>+</sup>): 773.1325.

FTIR (ATR, CHCl<sub>3</sub>) ν (cm<sup>-1</sup>) = 2993, 2958, 2922, 2854, 2221, 1706, 1667, 1569, 1494, 1462, 1433, 1404, 1376, 1359, 1338, 1293, 1258, 1223, 1205, 1183, 1142, 1099, 1085, 1068, 1018, 876, 823, 811, 801, 764, 733, 720, 622, 608.

m.p.: 310-311 °C.

**NDI3T-RDDCV:** The solid was filtered and washed with water, MeOH and hot MeOH to obtain the product 46 mg (61 %) as a purple powder.

<sup>1</sup>H- NMR (300 MHz, CDCl<sub>3</sub>/TFA-*d*) δ (ppm) = 9.03 (d, *J* = 8.1 Hz, 1H), 8.88 – 8.77 (m, 3H), 8.14 (s, 1H), 8.12 (s, 1H), 7.73 (d, *J* = 4.4 Hz, 1H), 7.56 (d, *J* = 4.4 Hz, 1H), 7.53 (d, *J* = 3.8 Hz, 1H), 7.43 (d, *J* = 4.3 Hz, 1H), 4.37 (d, *J* = 6.8 Hz, 2H), 4.21 (q, *J* = 7.1 Hz, 6H), 2.05 – 1.94 (m, 1H), 1.49 – 1.31 (m, 14H), 0.94 – 0.83 (m, 6H).

MALDI-HRMS (m/z) calc. for C<sub>52</sub>H<sub>37</sub>N<sub>9</sub>O<sub>5</sub>S<sub>5</sub>: 1027,1521, found (M<sup>+</sup>): 1027,1517.

FTIR (ATR, CHCl<sub>3</sub>) ν (cm<sup>-1</sup>) = 2953, 2922, 2853, 2217, 1707, 1665, 1573, 1540, 1460, 1445, 1428, 1375, 1334, 1215, 1196, 1123, 1055, 793, 763, 730.

m.p.: 314-315 °C.

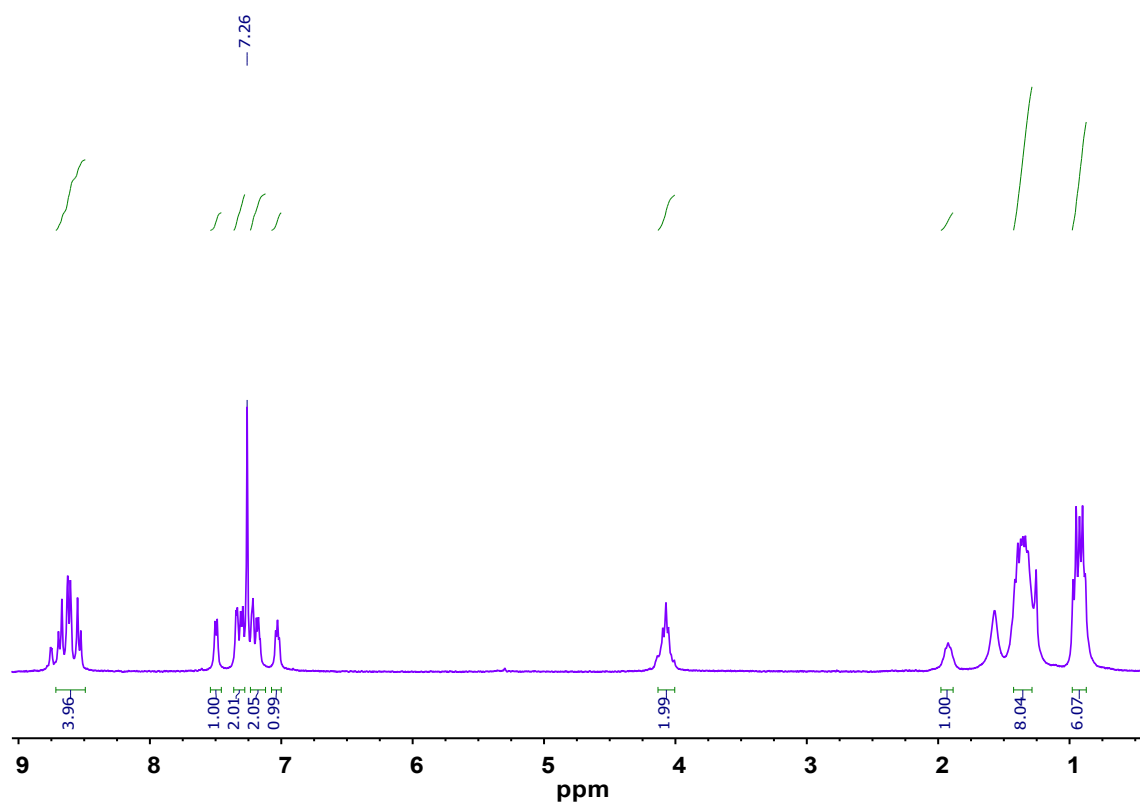

**Figure S1.** <sup>1</sup>H-NMR spectrum of NDI3T in CDCl<sub>3</sub>.

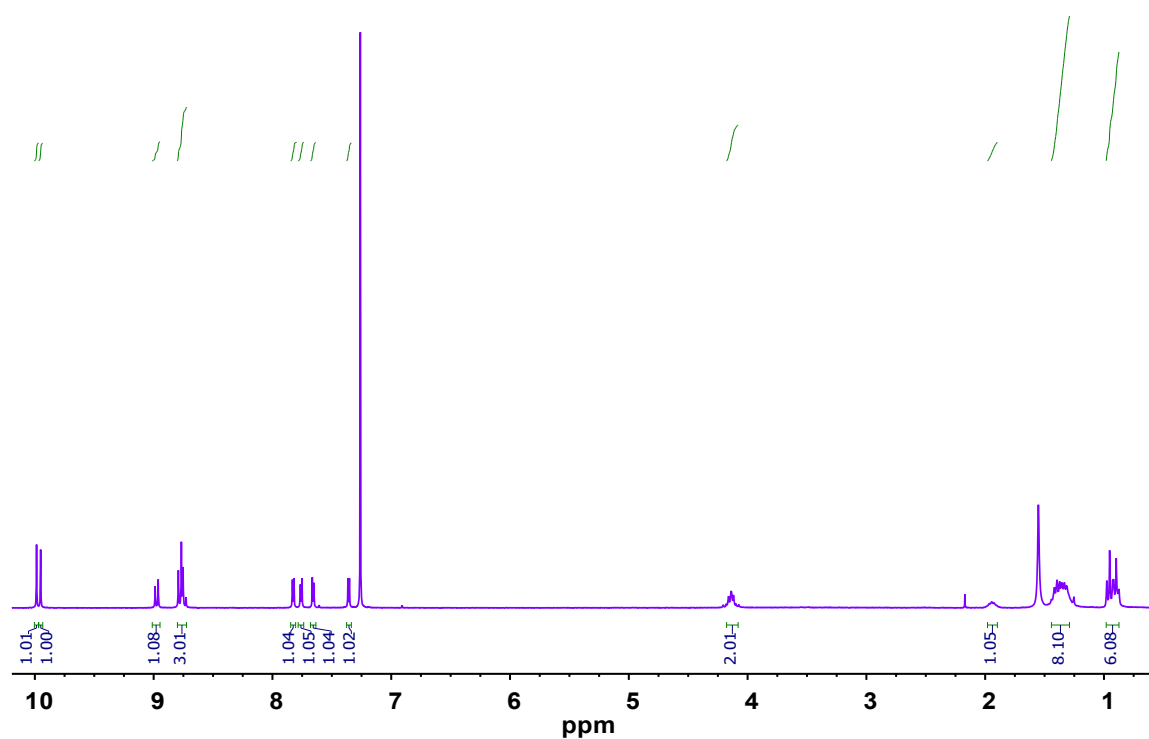

**Figure S2.** <sup>1</sup>H-NMR spectrum of NDI3T-CHO in CDCl<sub>3</sub>.

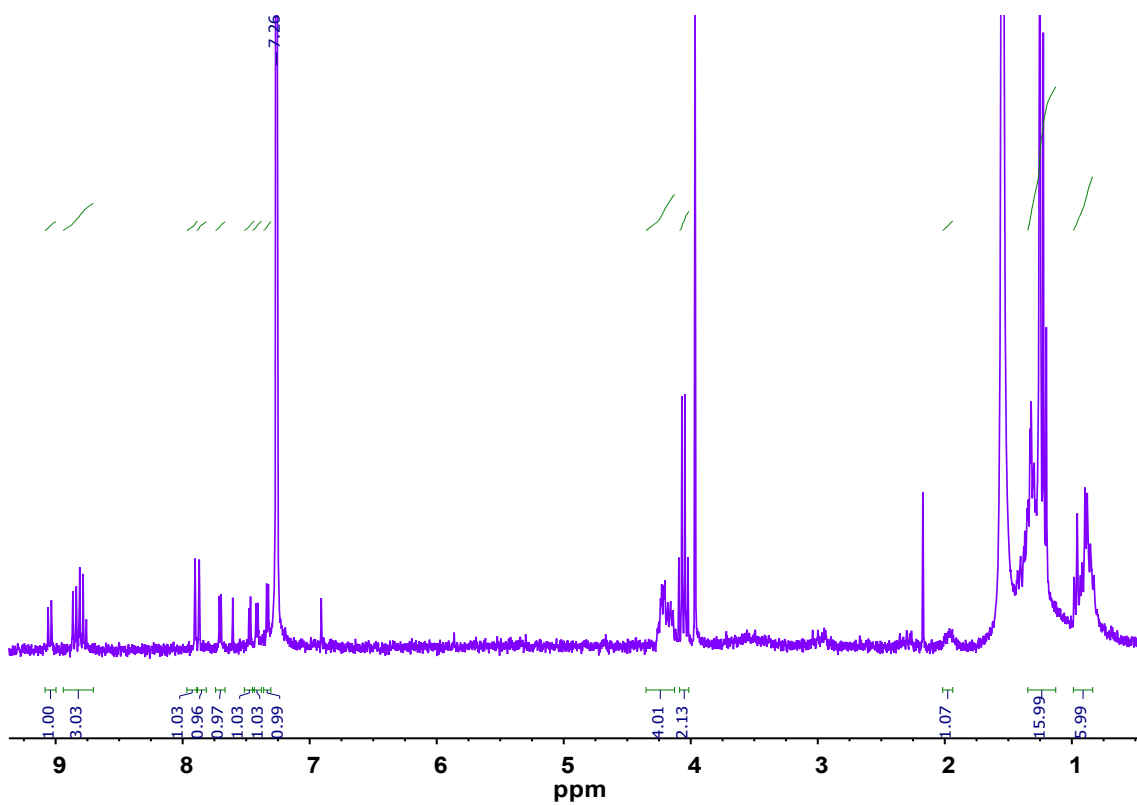

Figure S3.  $^1\text{H-NMR}$  spectrum of NDI3T-RD in  $\text{CDCl}_3$ .

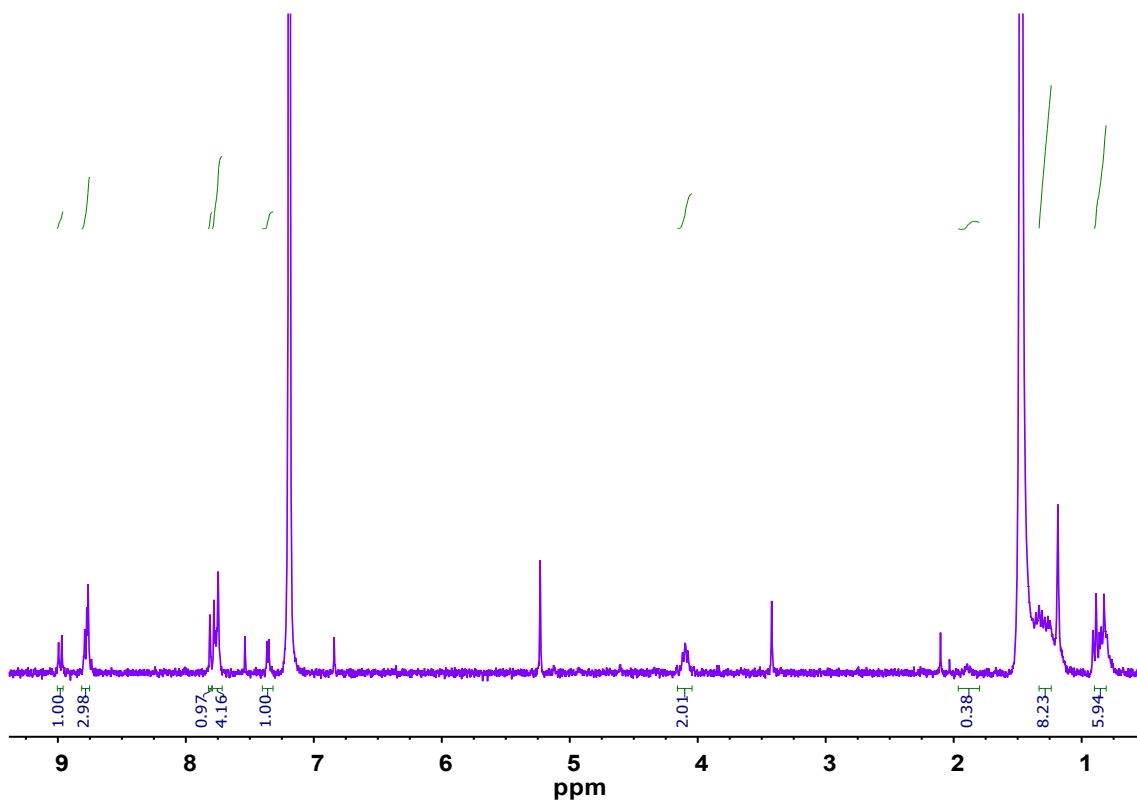

Figure S4.  $^1\text{H-NMR}$  spectrum of NDI3T-DCV in  $\text{CDCl}_3/\text{TFA-d}$ .

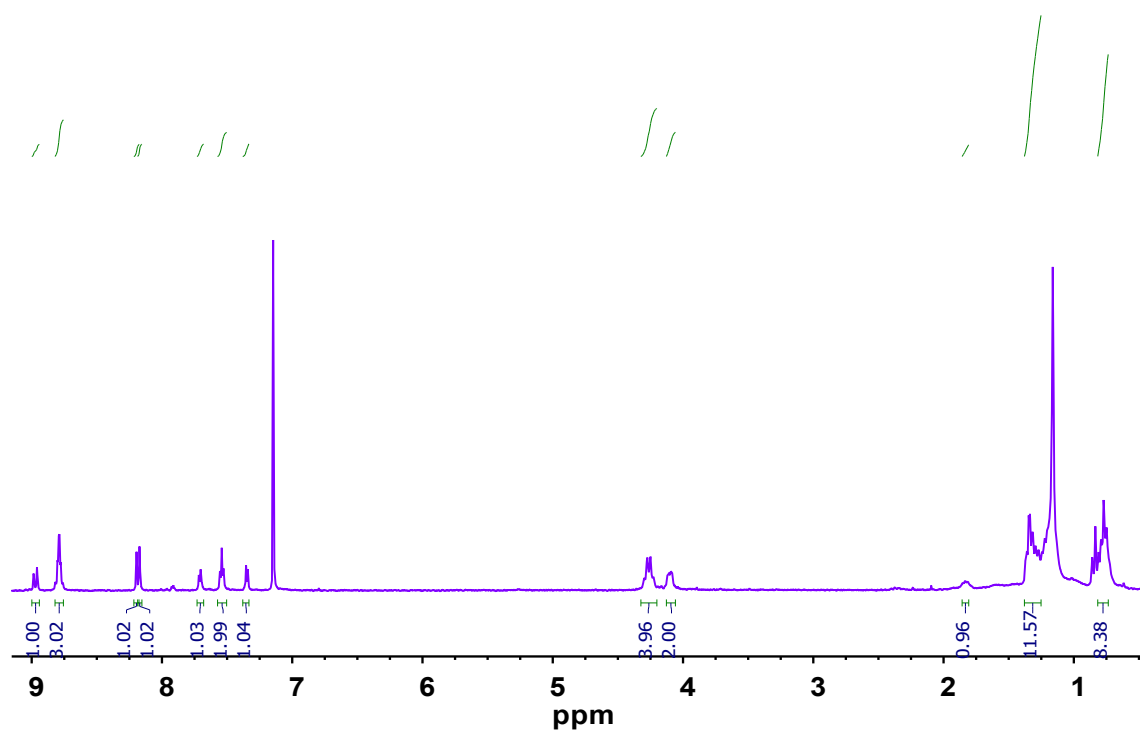

Figure S5. <sup>1</sup>H-NMR spectrum of NDI3T-RDDCV in CDCl<sub>3</sub>/TFA-*d*.

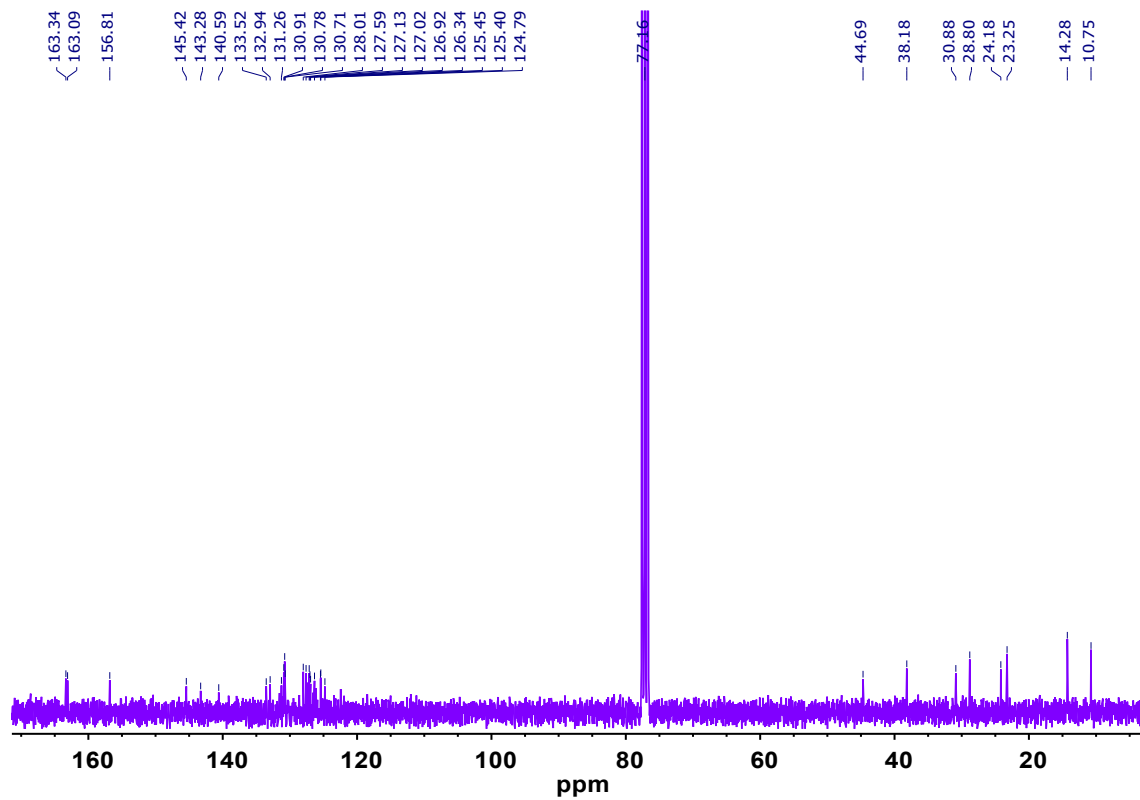

Figure S6. <sup>13</sup>C-NMR spectrum of NDI3T in CDCl<sub>3</sub>.



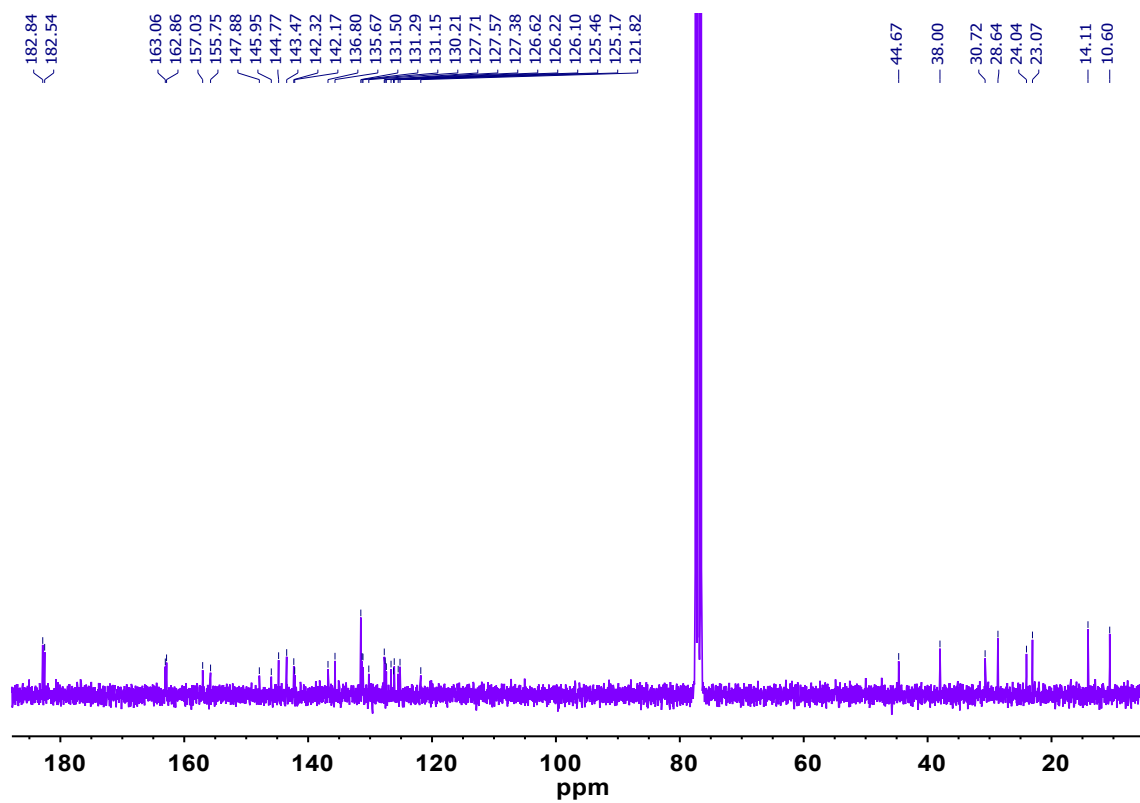

Figure S7.  $^{13}\text{C}$ -NMR spectrum of NDI3T-CHO in  $\text{CDCl}_3$ .

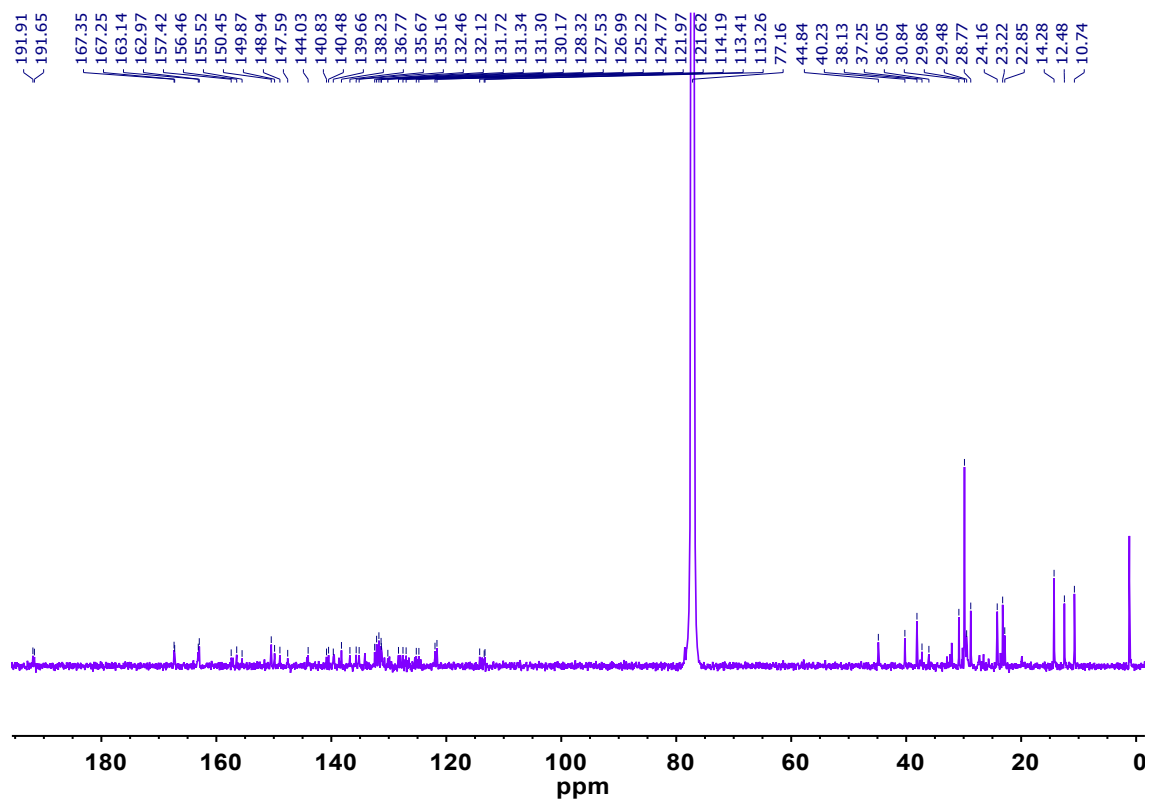

Figure S8.  $^{13}\text{C}$ -NMR spectrum of NDI3T-RD in  $\text{CDCl}_3$ .

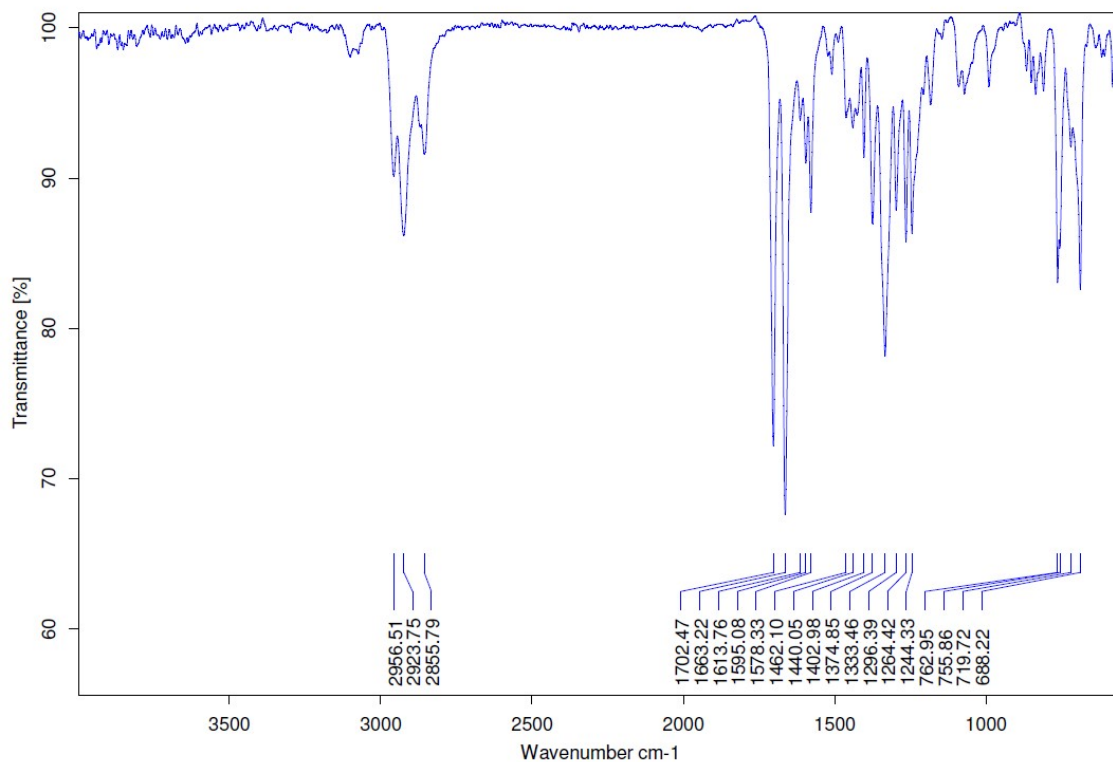

**Figure S9.** IR spectrum of NDI3T.

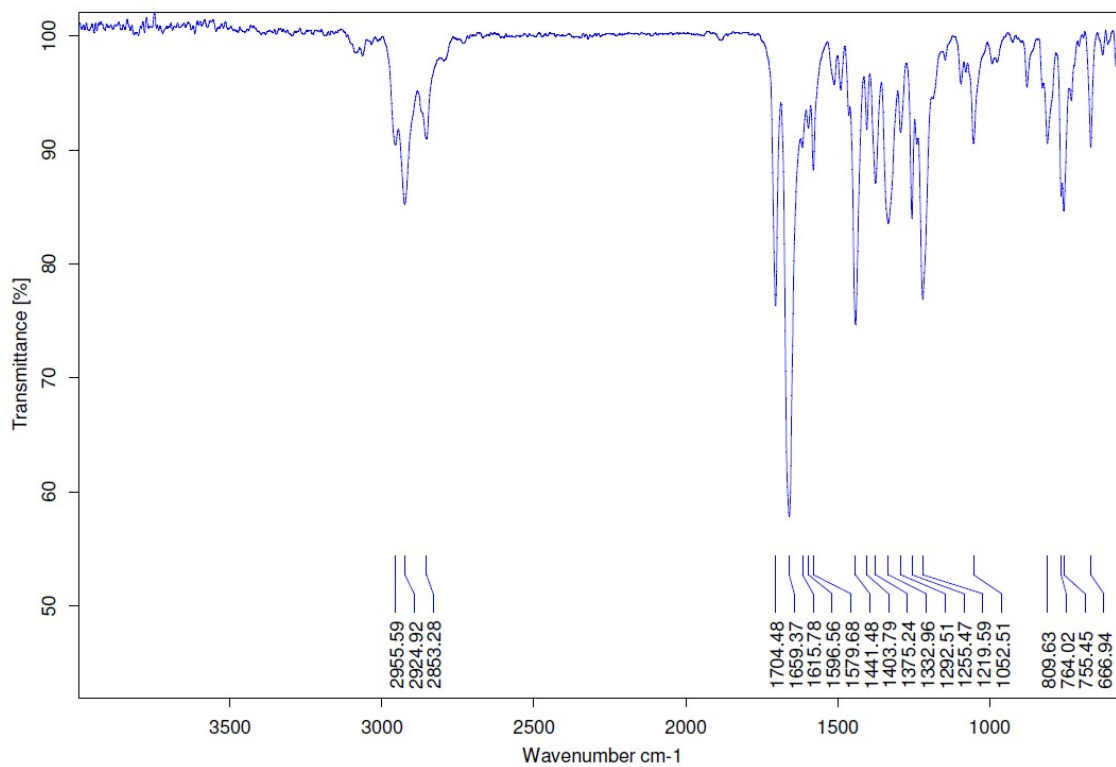

**Figure S10.** IR spectrum of NDI3T-CHO.

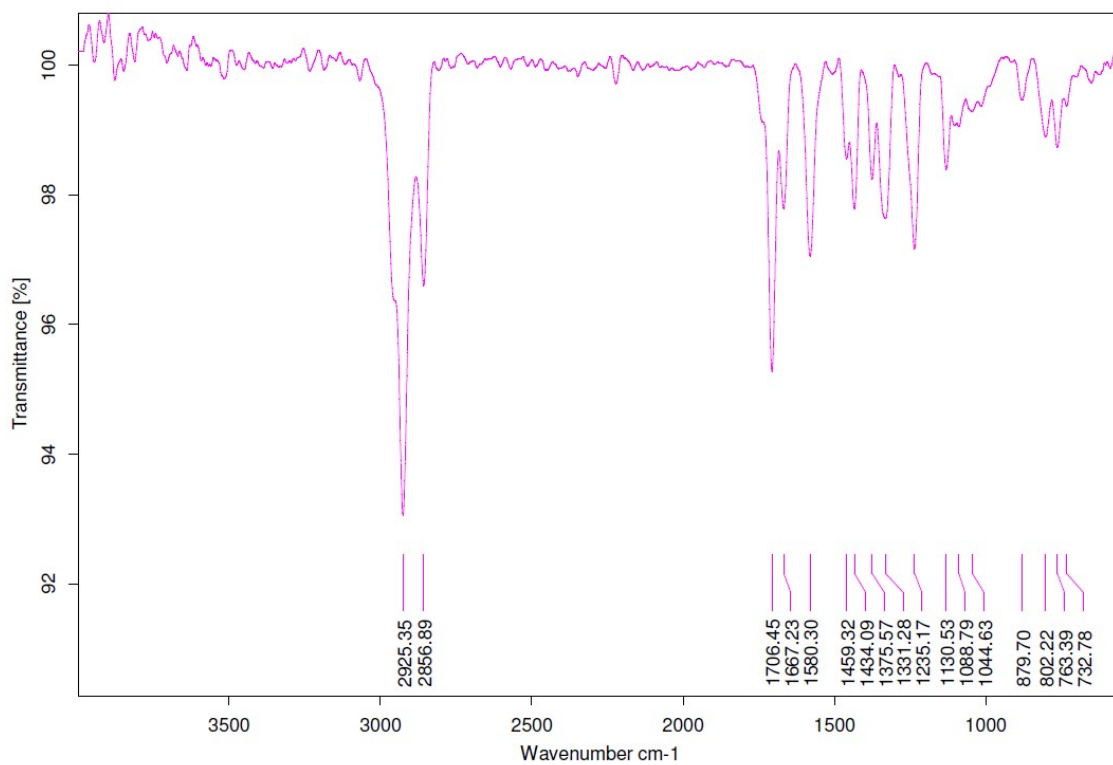

**Figure S11.** IR spectrum of NDI3T-RD.

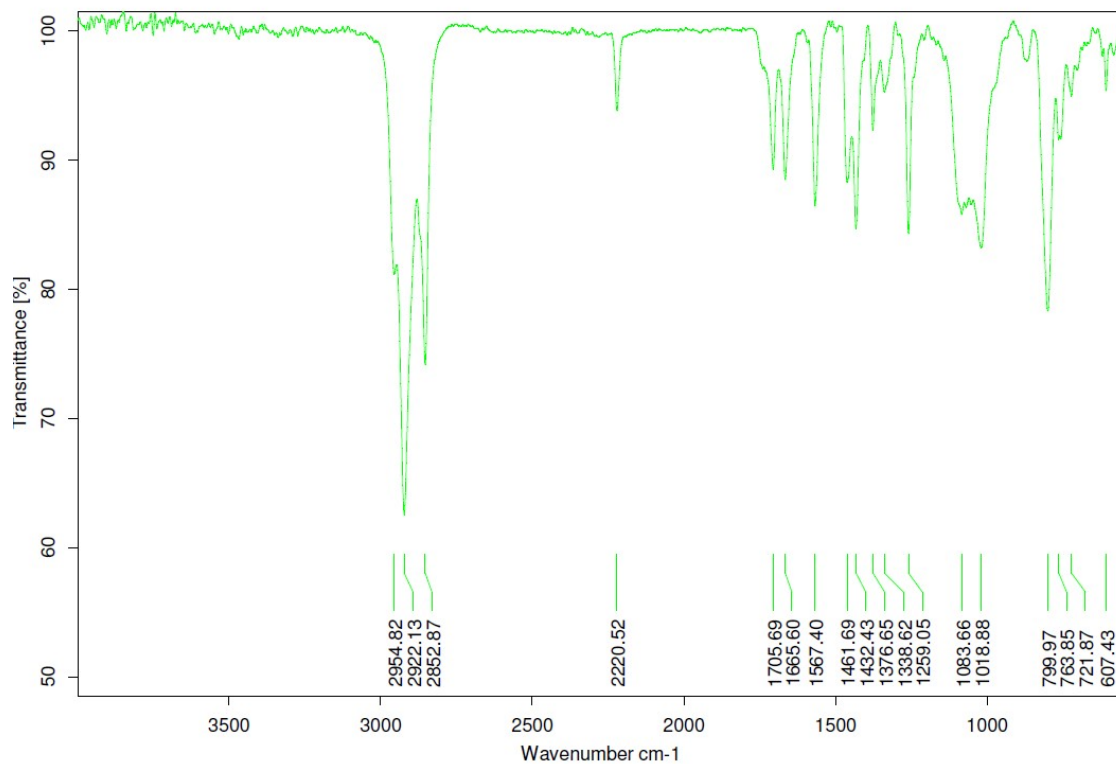

**Figure S12.** IR spectrum of NDI3T-DCV.

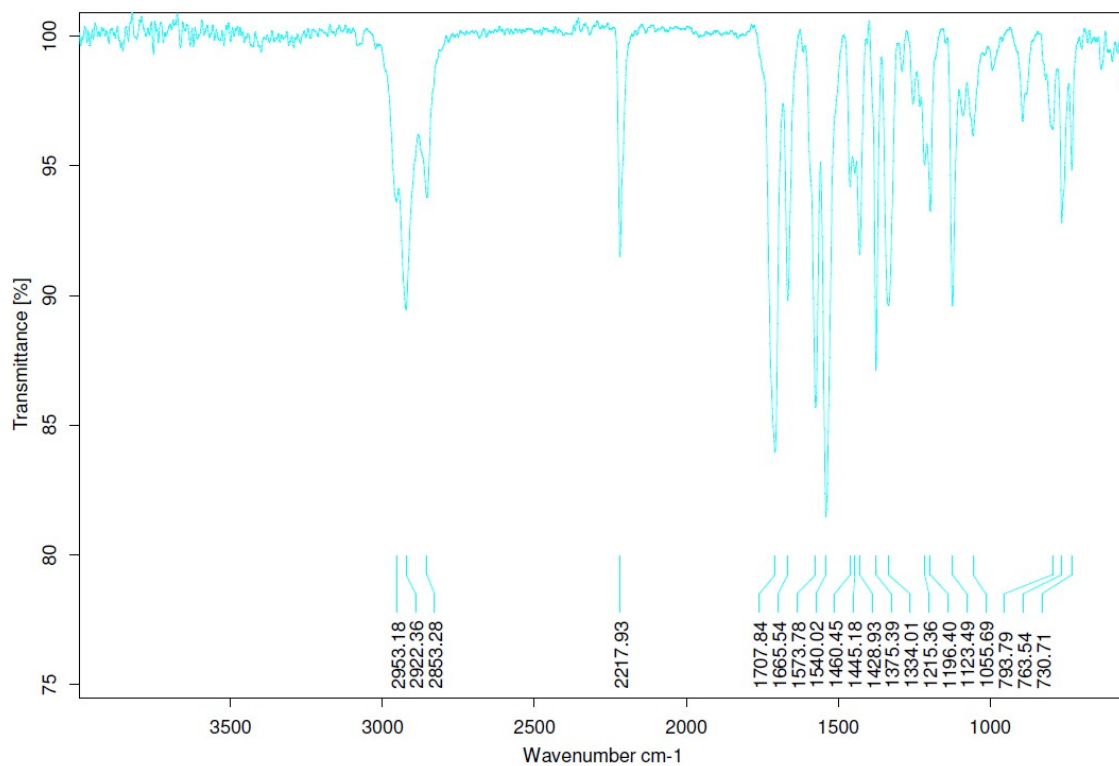

**Figure S13.** IR spectrum of NDI3T-RDDCV.

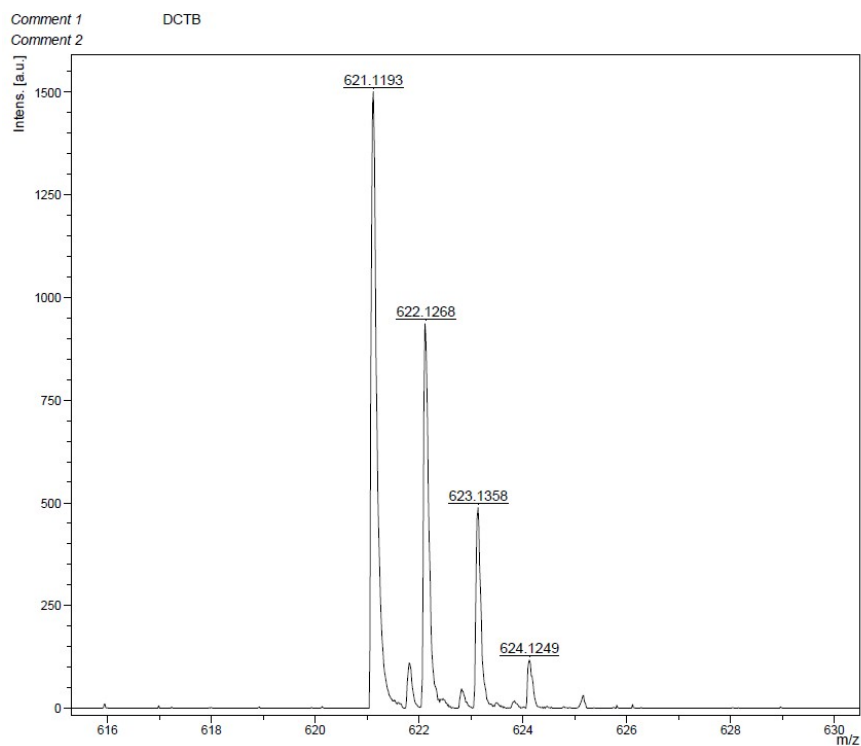

**Figure S14.** MALDI-HRMS (m/z) spectrum of NDI3T.

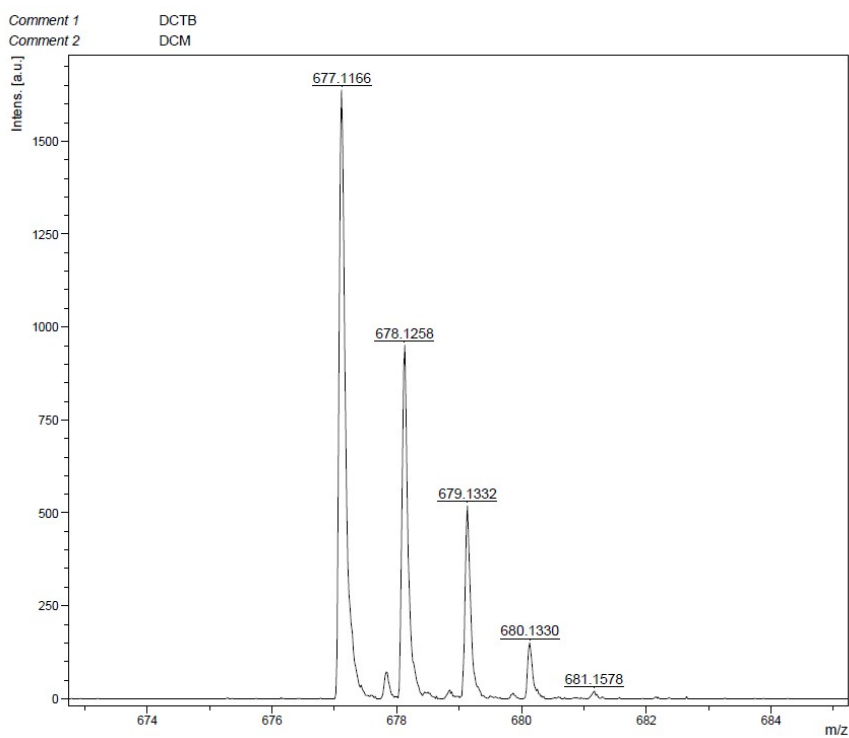

**Figure S15.** MALDI-HRMS (m/z) spectrum of NDI3T-CHO.

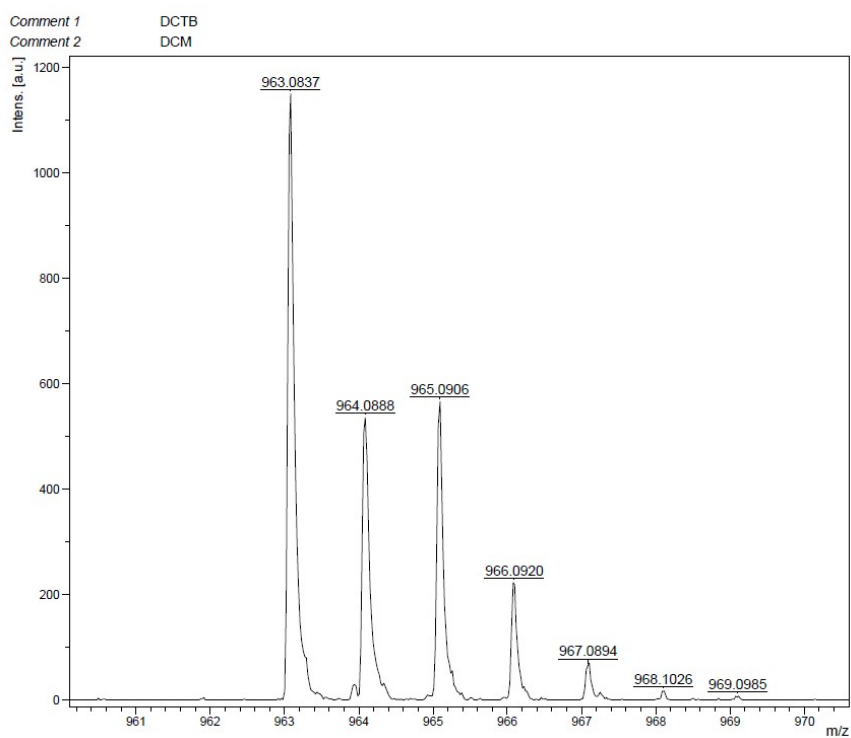

**Figure S16.** MALDI-HRMS (m/z) spectrum of NDI3T-RD.

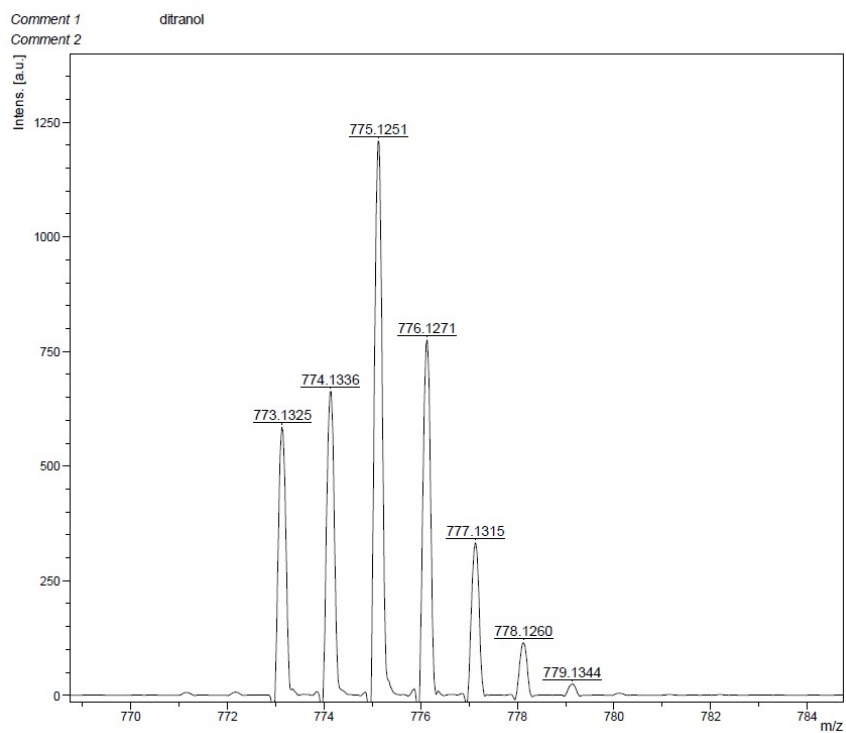

**Figure S17.** MALDI-HRMS (m/z) spectrum of NDI3T-DCV.

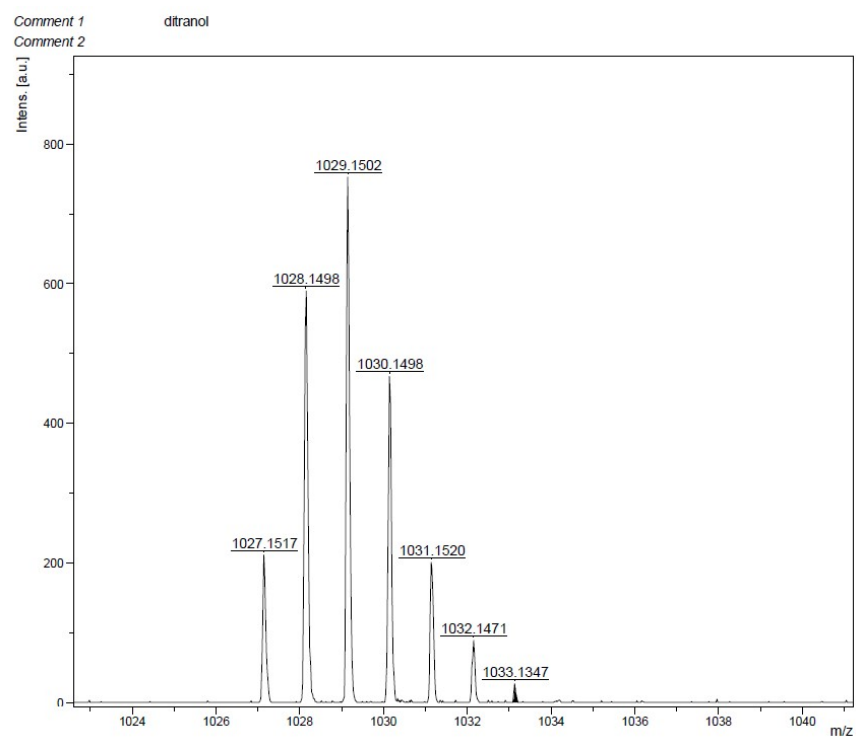

**Figure S18.** MALDI-HRMS (m/z) spectrum of NDI3T-RDDCV.

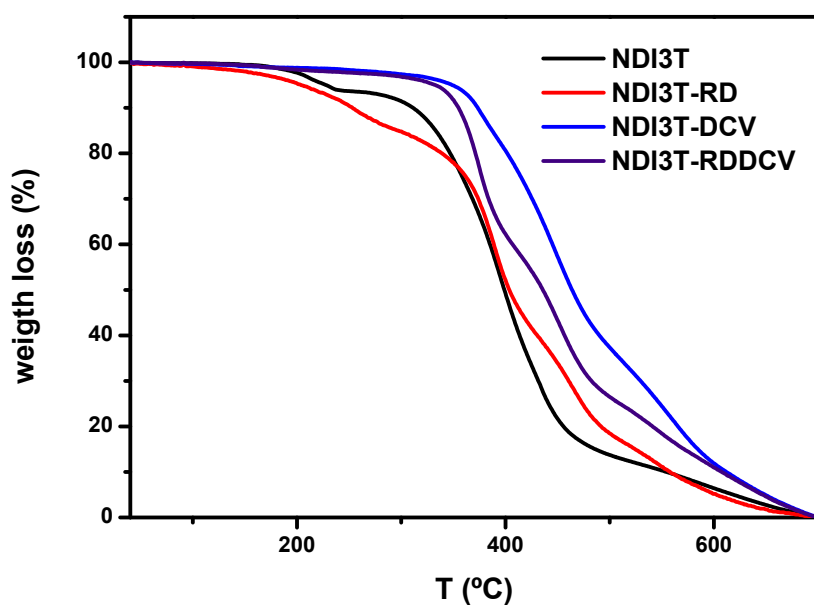

**Figure S19.** Thermogravimetric analyses of **NDI3T**, **NDI3T-RD**, **NDI3T-DCV** and **NDI3T-RDDCV** semiconductors.

### 3. DFT and TD-DFT calculations

Theoretical calculations for the NDI monomers were carried out in the frame of density functional theory (DFT), using the B3LYP functional<sup>4-6</sup> and the 6-31G\*\* basis set<sup>7, 8</sup> as implemented in the Gaussian 16 program.<sup>9</sup> 2-decyltetradecyl chains on the N-imide group of NDIs were replaced with isopropyl chains to simplify the calculations, for this reason **NDI3T** acronym is used to simplify the nomenclature. Geometry optimizations were performed without any symmetry constrains. On the basis of the resulting ground-state geometries, harmonic vibrational frequencies were calculated at the same theoretical level. The reorganization energies were calculated directly from the relevant points on the potential energy surfaces by using previously reported standard procedures.

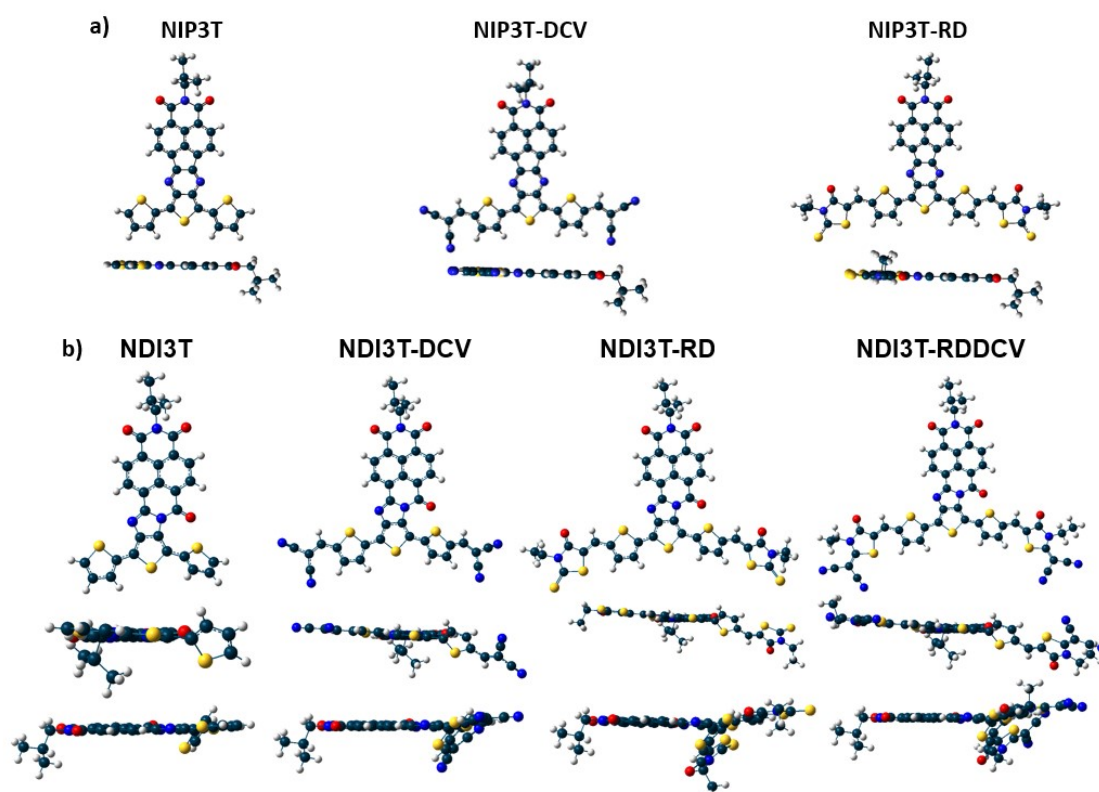

**Figure S20.** DFT//B3LYP/6-31G\*\* optimized molecular structures of a) NIP and b) NDI systems under study.

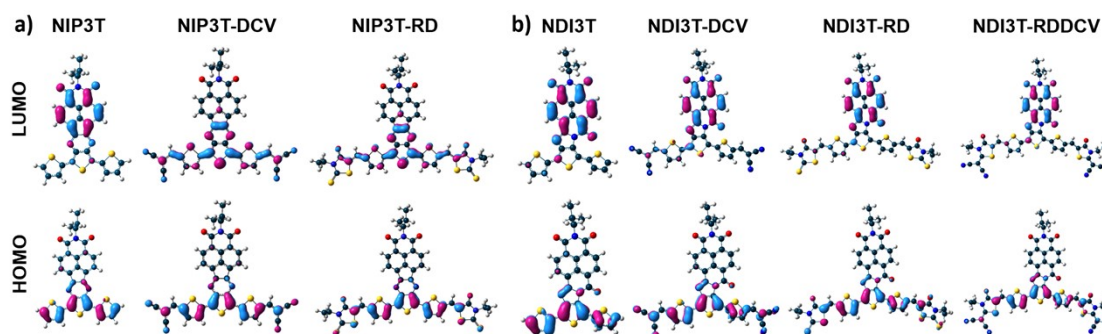

**Figure S21** DFT//B3LYP/6-31G\*\* molecular orbital topologies of (a) NIP3T-X and (b) NDI3T-X systems.



**Table S1.** HOMO-LUMO gap energies and TDDFT-calculated vertical transition energies with the corresponding description at B3LYP/6-31G\*\* level of theory. The oscillator strength values are given in brackets.

|                    | $E_{H-L}$ (eV) | $\lambda$ (f) (nm) | Description                                                    |
|--------------------|----------------|--------------------|----------------------------------------------------------------|
| <b>NDI3T</b>       | 1.96           | 736 (0.22)         | HOMO→LUMO (99%)                                                |
|                    |                | 468 (0.18)         | H-1→LUMO (96%)                                                 |
|                    |                | 419 (0.23)         | HOMO→L+1 (91%), H-2→LUMO (4%),<br>HOMO→L+2 (3%)                |
|                    |                | 340 (0.24)         | H-5→L+1 (17%), HOMO→L+2 (59%)                                  |
| <b>NDI3T-DCV</b>   | 2.07           | 686 (0.31)         | HOMO→LUMO (97%), HOMO→L+1 (3%)                                 |
|                    |                | 522 (1.16)         | HOMO→L+1 (96%), HOMO→LUMO (3%)                                 |
|                    |                | 424 (0.29)         | H-2→LUMO (62%), H-1→L+1 (18%),<br>HOMO→L+2 (13%)               |
| <b>NDI3T-RD</b>    | 1.85           | 781 (0.31)         | HOMO→LUMO (99%)                                                |
|                    |                | 551 (1.62)         | HOMO→L+1 (95%), H-1→LUMO (3%)                                  |
|                    |                | 434 (0.29)         | H-5→LUMO (73%), H-1→L+1 (13%),<br>H-7→LUMO (3%), H-4→LUMO (4%) |
| <b>NDI3T-RDDCV</b> | 1.93           | 746 (0.38)         | HOMO→LUMO (99%)                                                |
|                    |                | 561 (1.19)         | HOMO→L+1 (83%), H-1→LUMO (16%)                                 |
|                    |                | 554 (0.56)         | H-1→LUMO (82%), HOMO→L+1 (15%)                                 |
|                    |                | 438 (0.46)         | H-3→LUMO (60%), H-1→L+1 (27%),<br>H-4→LUMO (4%), H-2→LUMO (4%) |
| <b>NIP3T</b>       | 2.17           | 657 (0.23)         | HOMO→LUMO (98%)                                                |
|                    |                | 632 (0.14)         | HOMO→L+1 (98%), HOMO→L+2 (3%)                                  |
|                    |                | 376 (0.24)         | H-1→L+1 (92%), HOMO→L+4 (3%)                                   |
|                    |                | 363 (0.31)         | H-2→LUMO (90%), H-3→L+1 (3%)                                   |
|                    |                | 357 (0.39)         | H-3→LUMO (17%), H-1→L+2 (48%)<br>H-3→LUMO (7%), H-4→L+1 (5%)   |
|                    |                | 328 (0.64)         | H-5→L+1 (53%), H-3→L+1 (36%)                                   |
| <b>NIP3T-DCV</b>   | 2.00           | 665 (0.85)         | HOMO→LUMO (98%), HOMO→L+2 (3%)                                 |
|                    |                | 610 (0.19)         | HOMO→L+1 (98%)                                                 |
|                    |                | 472 (0.58)         | HOMO→L+2 (90%), H-2→LUMO (4%),<br>HOMO→LUMO (4%)               |
|                    |                | 416 (0.50)         | H-1→L+2 (32%), HOMO→L+3 (51%),<br>H-3→LUMO (7%), H-2→L+1 (7%)  |
|                    |                | 410 (0.21)         | H-1→L+1 (89%), H-3→L+1 (5%),<br>HOMO→L+2 (2%)                  |
|                    |                | 364 (0.19)         | H-3→LUMO (22%), H-2→L+1 (45%)                                  |

|                 |      |            |                                                |
|-----------------|------|------------|------------------------------------------------|
| <b>NIP3T-RD</b> | 1.90 | 725 (1.04) | HOMO→LUMO (98%), HOMO→L+2 (2%)                 |
|                 |      | 681 (0.24) | HOMO→L+1 (98%)                                 |
|                 |      | 508 (0.68) | HOMO→L+2 (89%), H-1→L+1 (6%), HOMO→LUMO (2%)   |
|                 |      | 479 (0.33) | H-1→L+1 (93%), HOMO→L+2 (6%)                   |
|                 |      | 458 (0.33) | H-1→LUMO (20%), HOMO→L+3 (72%)<br>H-4→L+1 (3%) |
|                 |      | 370 (0.28) | H-1→L+3 (59%), HOMO→L+4 (36%)                  |

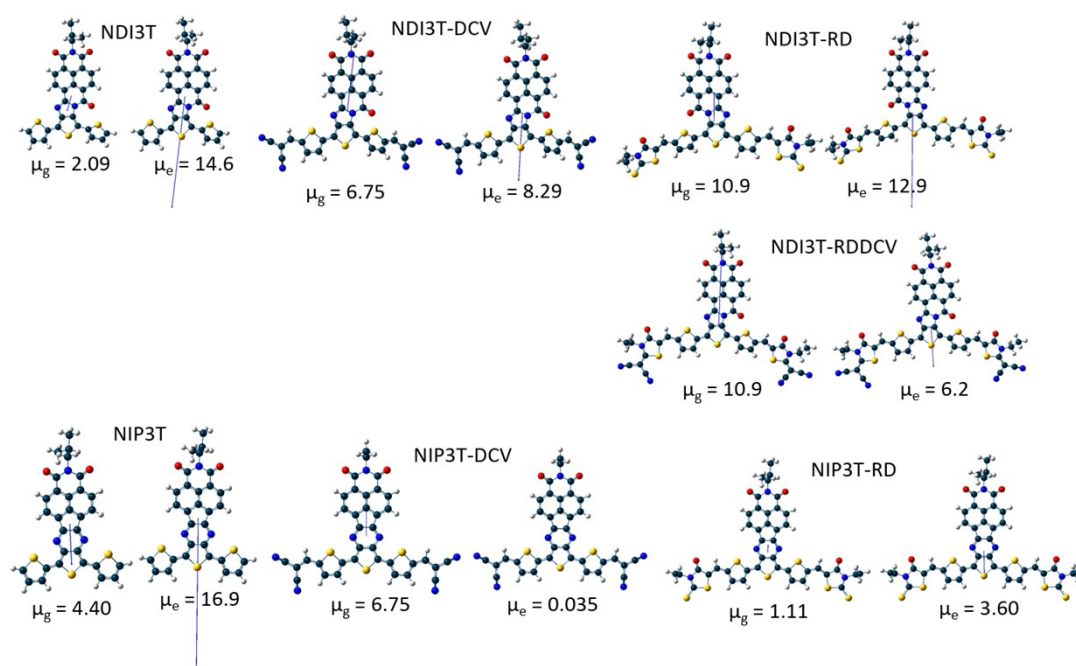

**Figure S22.** B3LYP/6-31G\*\* calculated dipole moments for **NDI3T-X** and **NIP3T-X** systems of the ground electronic state ( $\mu_g$ ) and the excited state ( $\mu_e$ ).

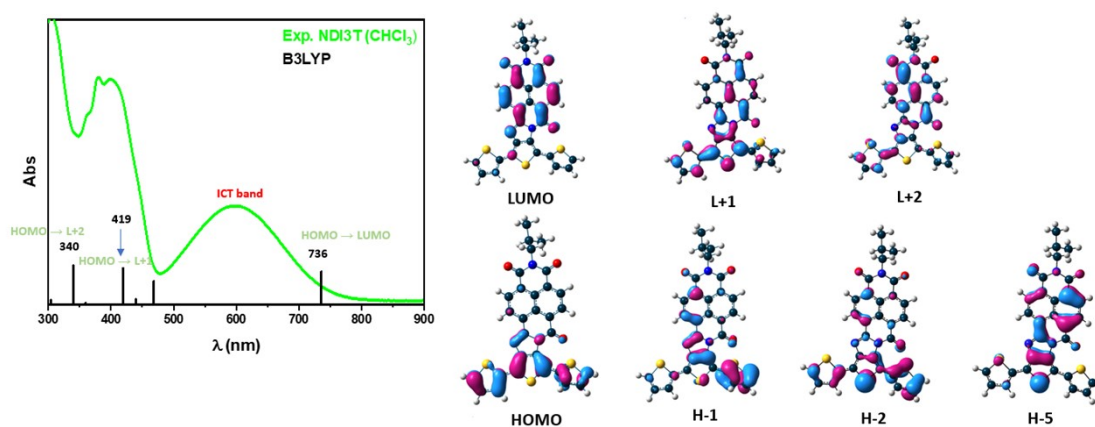

**Figure S23.** UV-Vis-NIR absorption spectra of **NDI3T** in  $\text{CHCl}_3$ , the TDDFT-B3LYP/6-31G\*\* calculated vertical transition energies and the molecular orbital topologies.

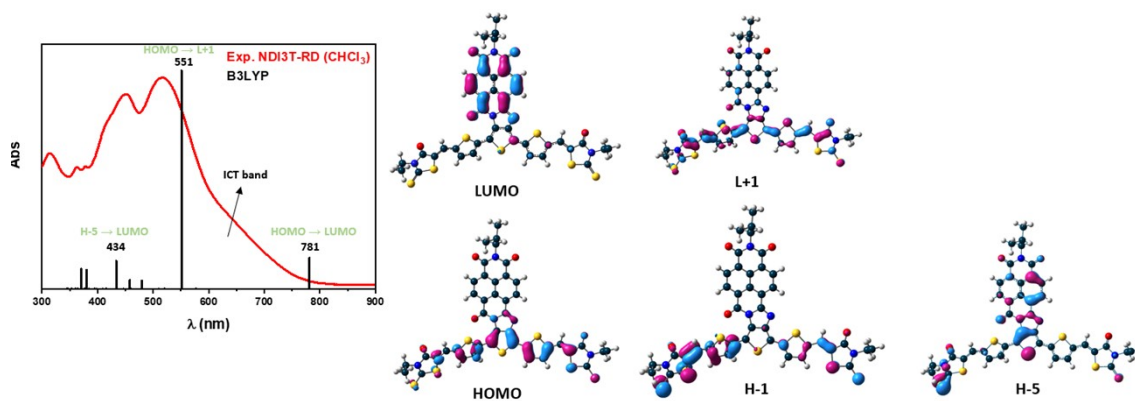

**Figure S24.** UV-Vis-NIR absorption spectra of NDI3T-RD in  $\text{CHCl}_3$ , the TDDFT-B3LYP/6-31G\*\* calculated vertical transition energies and the molecular orbital topologies.

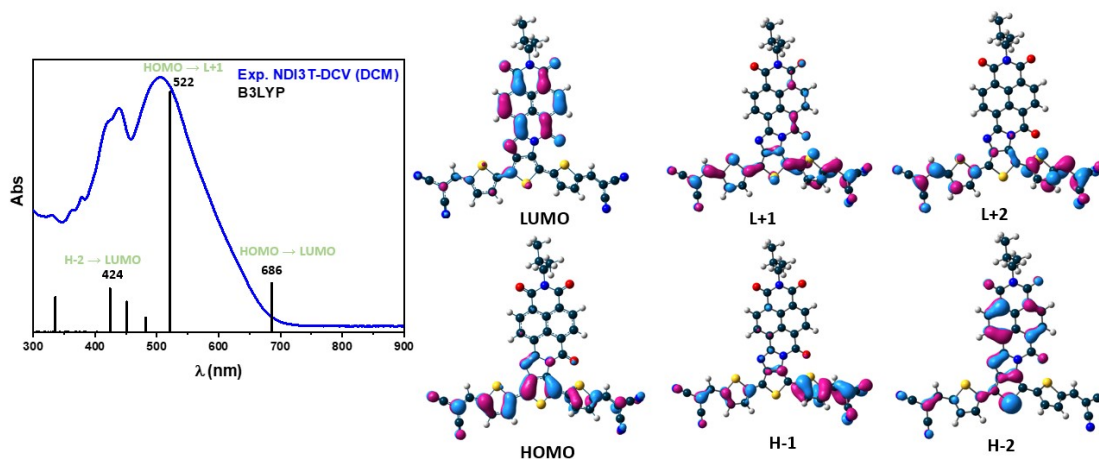

**Figure S25.** UV-Vis-NIR absorption spectra of NDI3T-DCV in  $\text{CHCl}_3$ , the TDDFT-B3LYP/6-31G\*\* calculated vertical transition energies and the molecular orbital topologies.

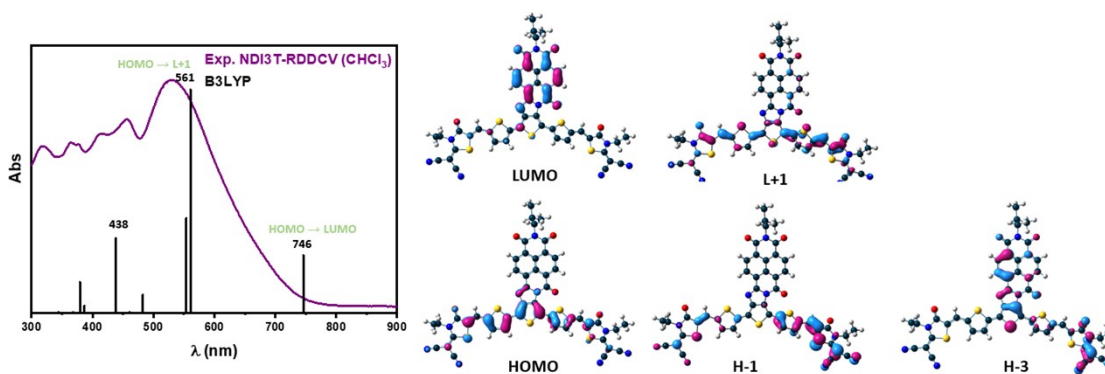

**Figure S26.** UV-Vis-NIR absorption spectra of NDI3T-RDDCV in  $\text{CHCl}_3$ , the TDDFT-B3LYP/6-31G\*\* calculated vertical transition energies and the molecular orbital topologies.

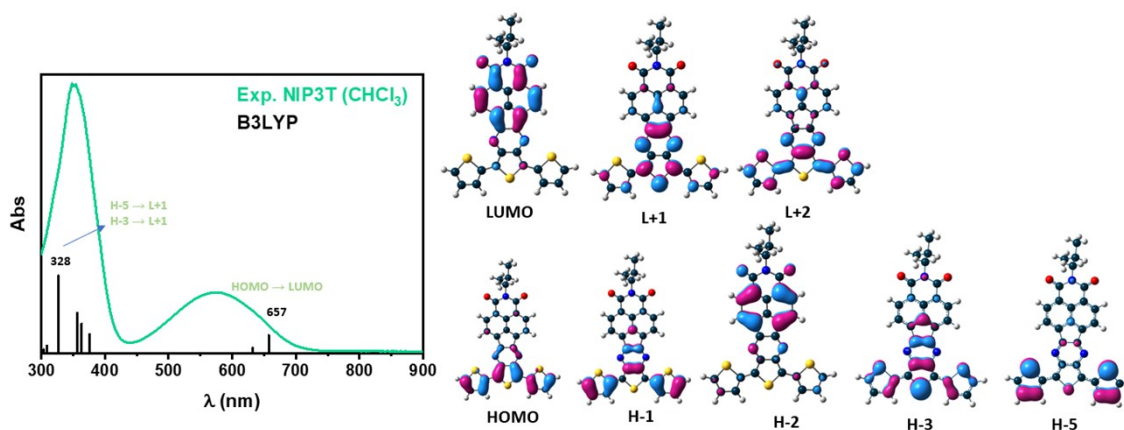

**Figure S27.** UV-Vis-NIR absorption spectra of NIP3T in  $\text{CHCl}_3$ , the TDDFT-B3LYP/6-31G\*\*<sup>\*</sup>-calculated vertical transition energies and the molecular orbital topologies.

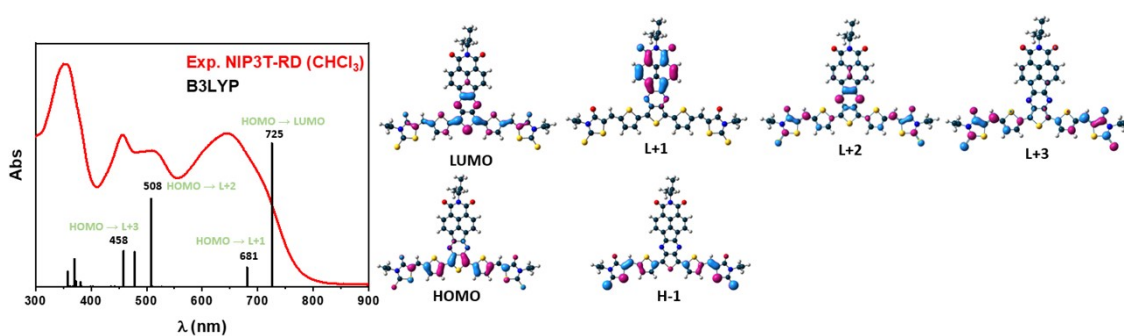

**Figure S28.** UV-Vis-NIR absorption spectra of NIP3T-RD in  $\text{CHCl}_3$ , the TDDFT-B3LYP/6-31G\*\*<sup>\*</sup>-calculated vertical transition energies and the molecular orbital topologies.

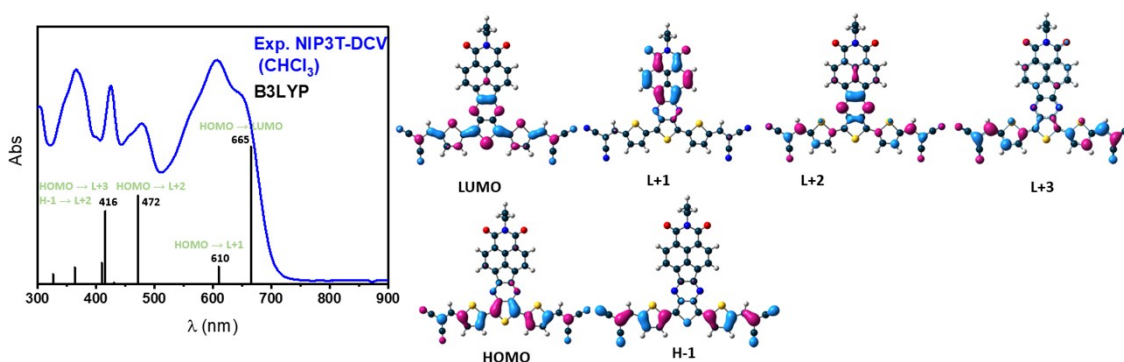

**Figure S29.** UV-Vis-NIR absorption spectra of NIP3T-DCV in  $\text{CHCl}_3$ , the TDDFT-B3LYP/6-31G\*\*<sup>\*</sup>-calculated vertical transition energies and the molecular orbital topologies.

## 4. FT-Raman

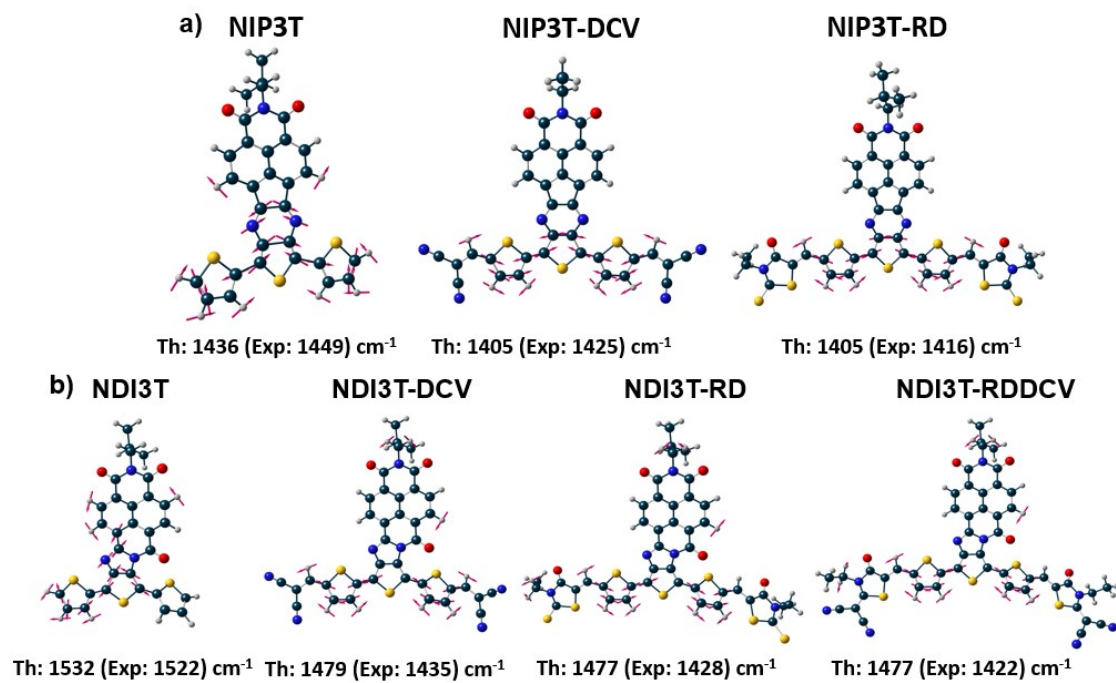

Figure S30. B3LYP/6-31G\*\* predicted eigenvectors for the a) NIP3T-X and b) NDI3T-X systems.

## 5. UV-Vis and electrochemical data

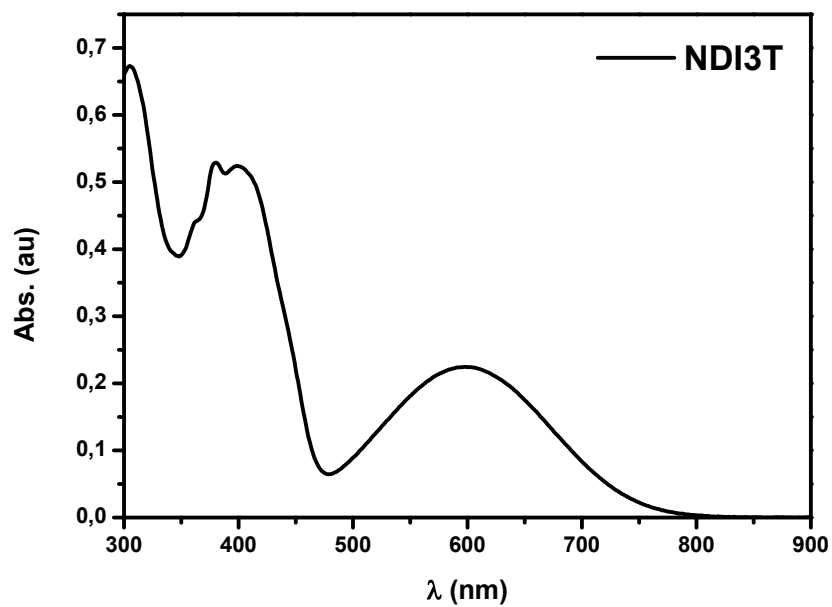

Figure S31. UV-Vis spectra of NDI3T  $2.75 \times 10^{-5}$  M in chloroform solution.

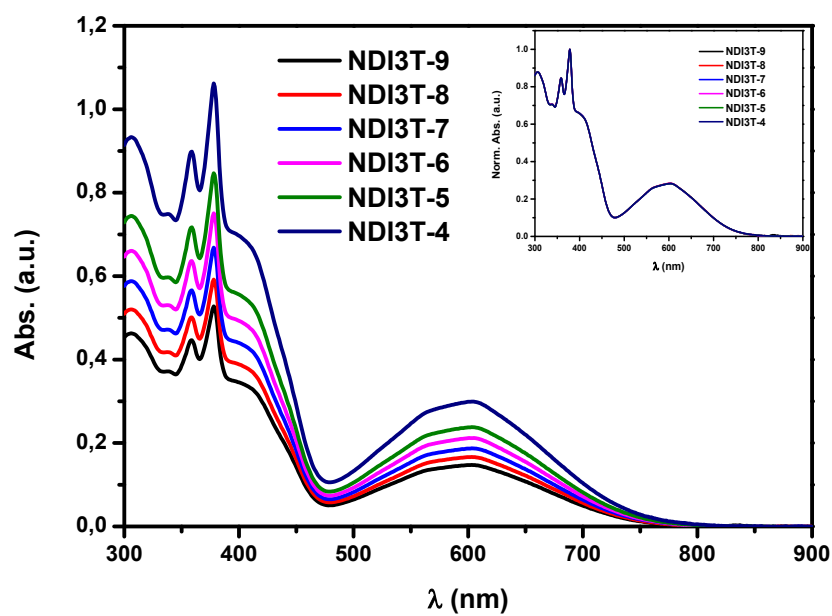

Figure S32. UV-Vis spectra of NDI3T dilutions in chloroform solution.

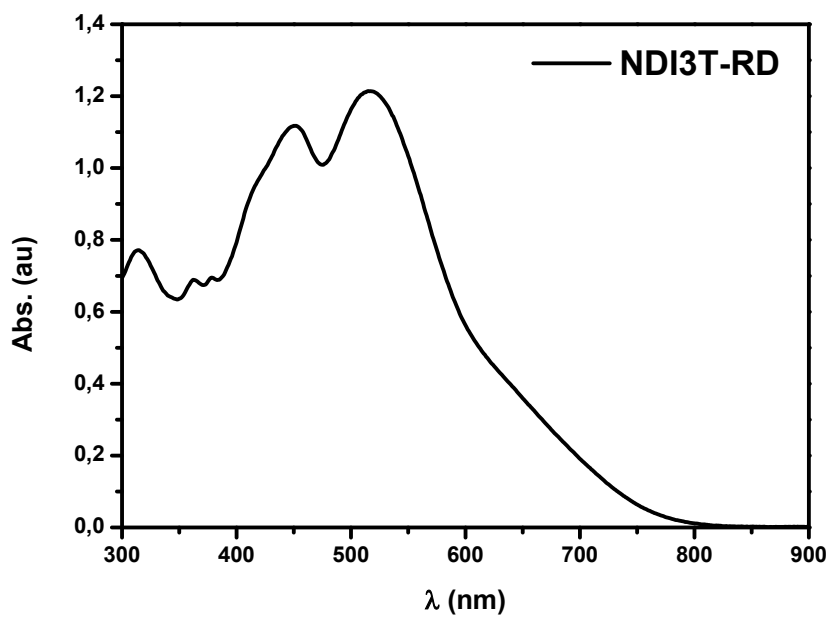

Figure S33. UV-Vis spectra of **NDI3T-RD**  $2.75 \times 10^{-5}$  M in chloroform solution.

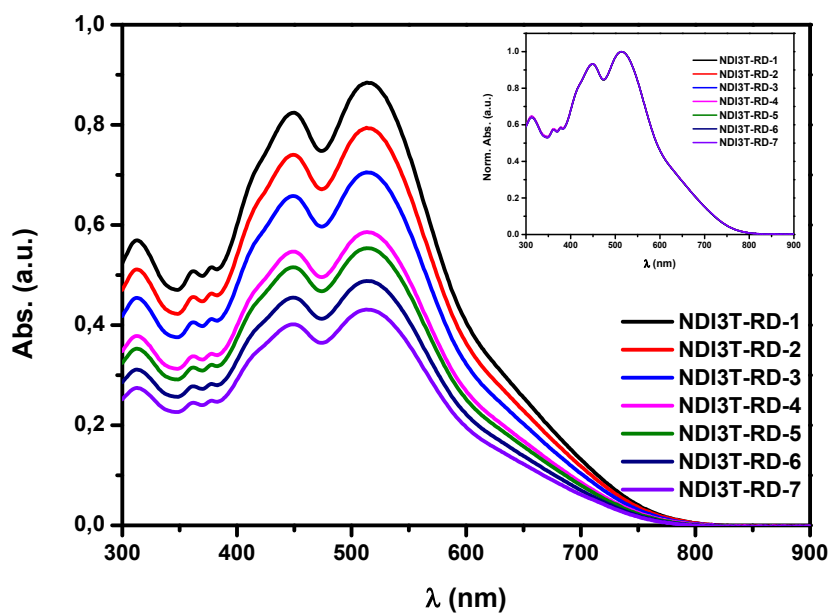

Figure S34. UV-Vis spectra of **NDI3T-RD** dilutions in chloroform solution.

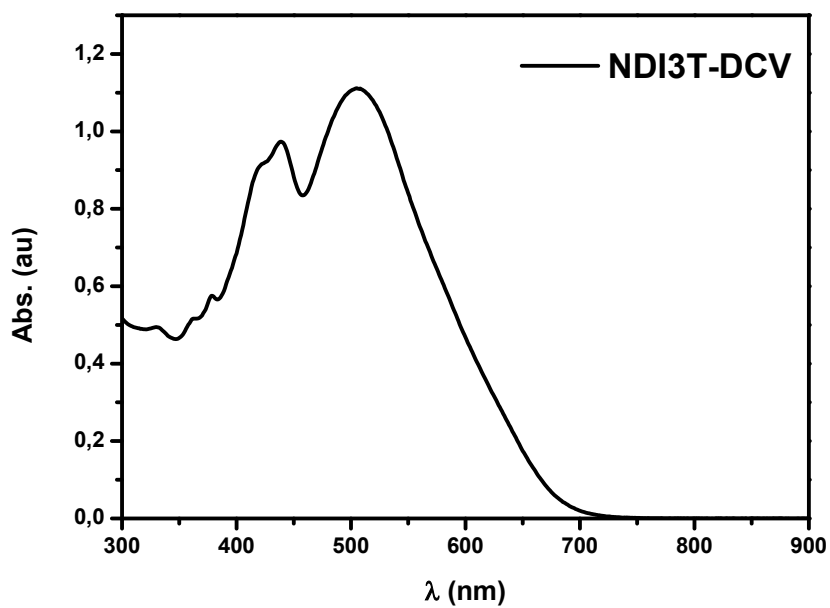

Figure S35. UV-Vis spectra of NDI3T-DCV  $2.75 \times 10^{-5}$  M in chloroform solution.

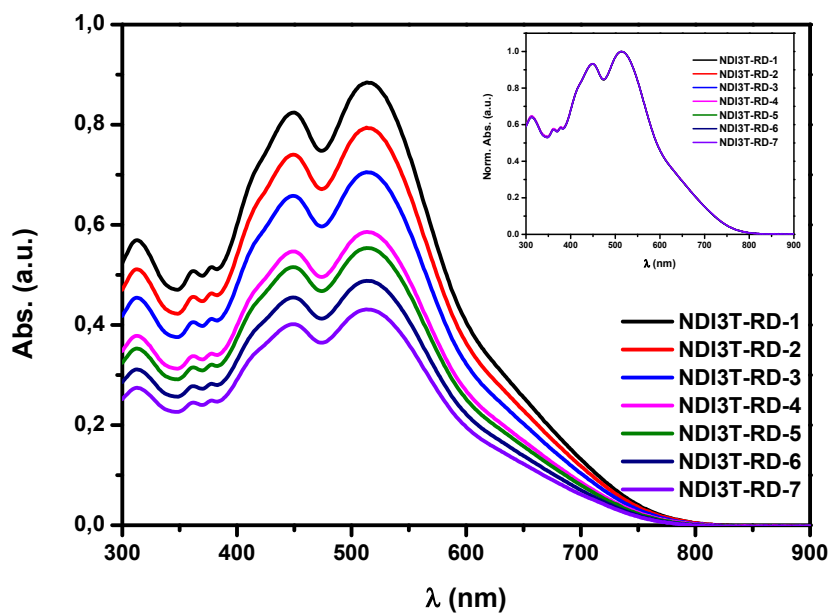

Figure S36. UV-Vis spectra of NDI3T-DCV dilutions in chloroform solution.



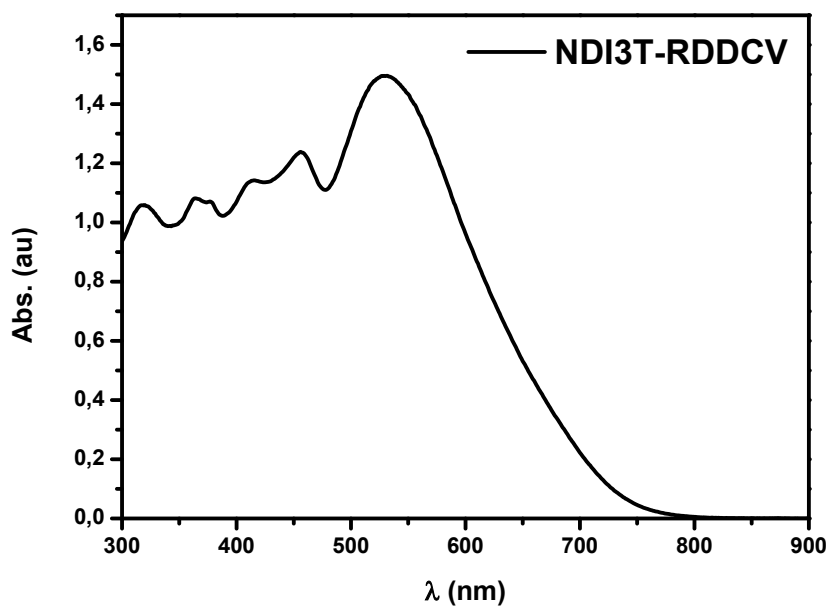

Figure S37. UV-Vis spectra of NDI3T-RDDCV  $2.75 \times 10^{-5}$  M in chloroform solution.

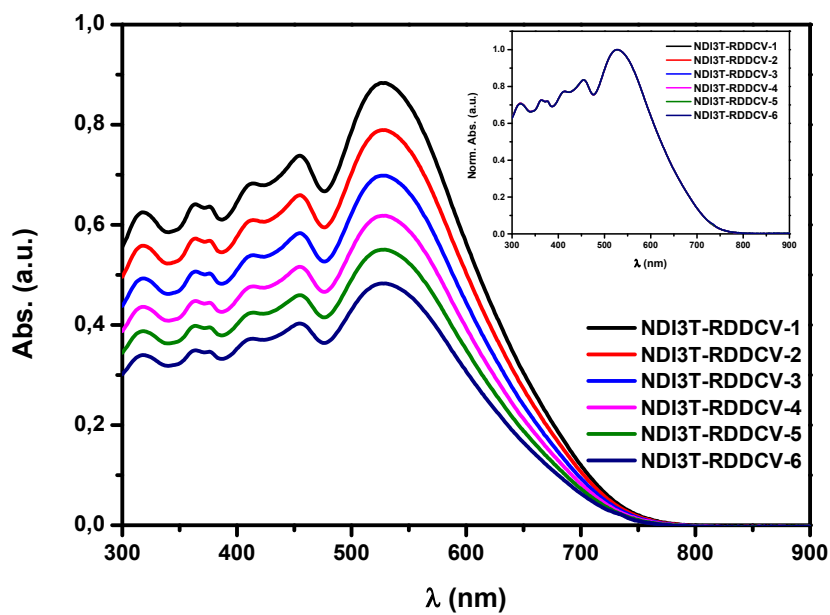

Figure S38. UV-Vis spectra of NDI3T-RDDCV dilutions in chloroform solution.

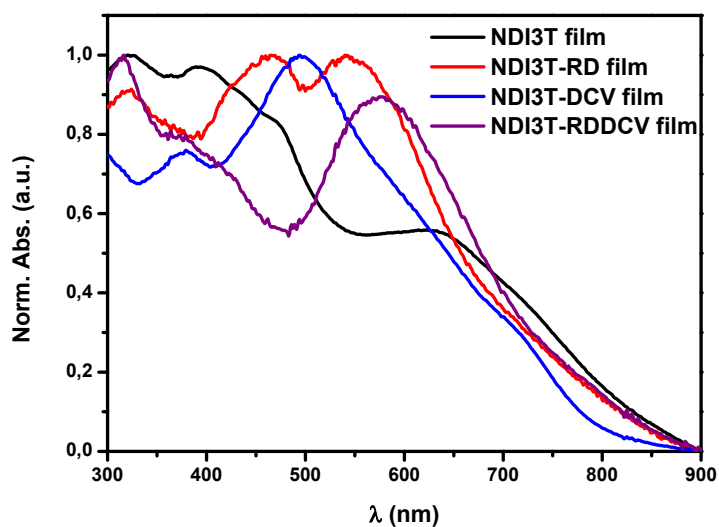

Figure S39. UV-Vis spectra of NDI3T-X semiconductors in thin film.

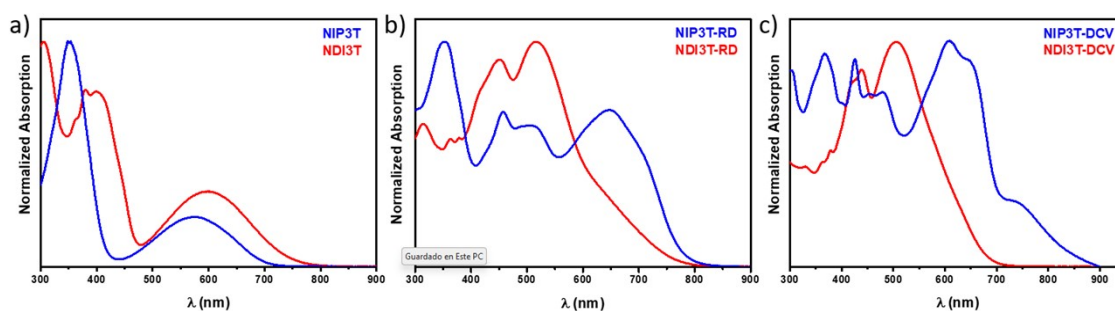

Figure S40X. UV-Vis spectra of NIP3T-X semiconductors compared with the NDI3T-X semiconductors.

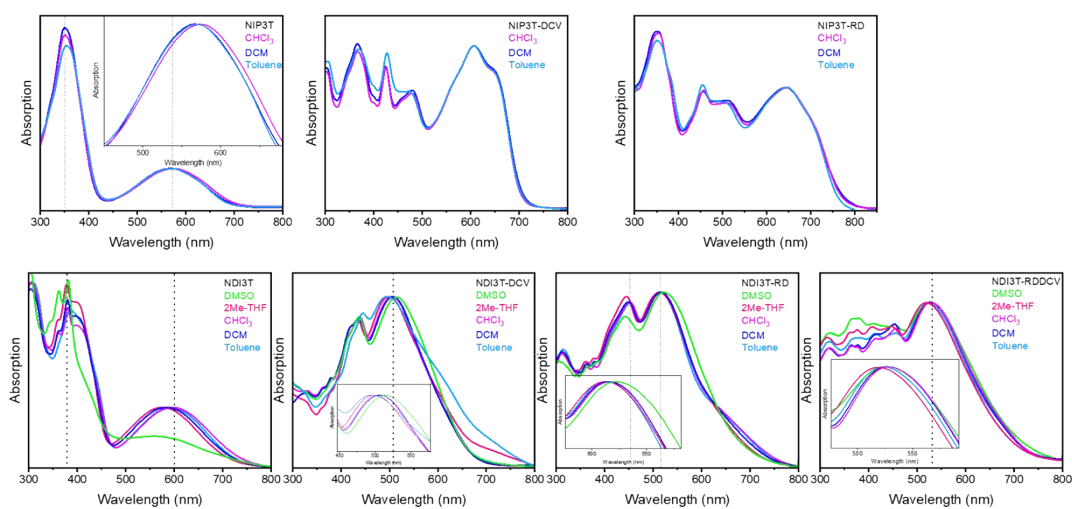

Figure S41. Normalized UV-Vis spectra of NIP3T-X and NDI3T-X systems in various solvents.

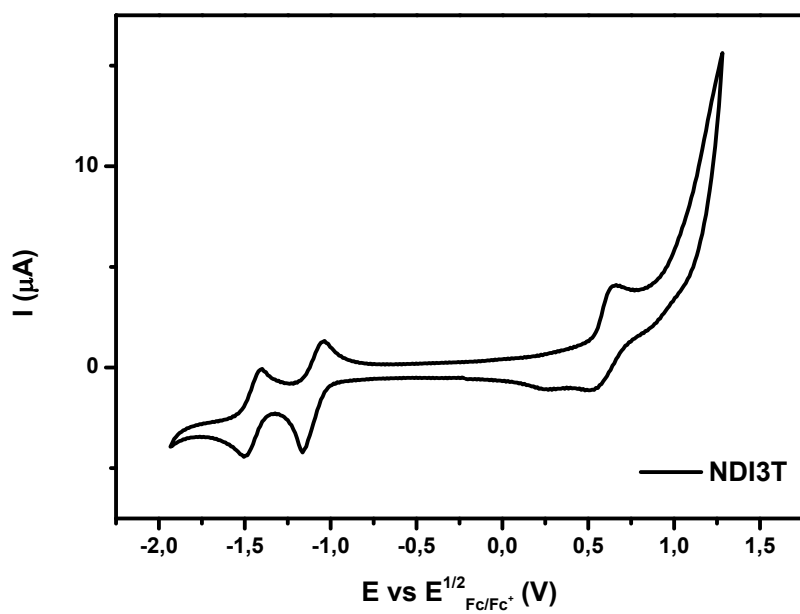

Figure S42. Cyclic voltammetry of **NDI3T** and TBAPF6 0.1M in dichloromethane solution.

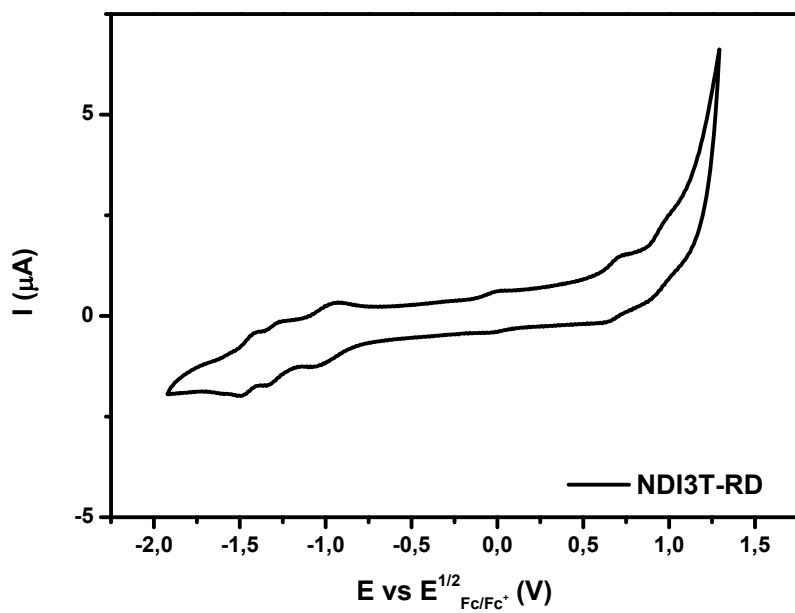

Figure S43. Cyclic voltammetry of **NDI3T-RD** and TBAPF6 0.1M in dichloromethane solution.

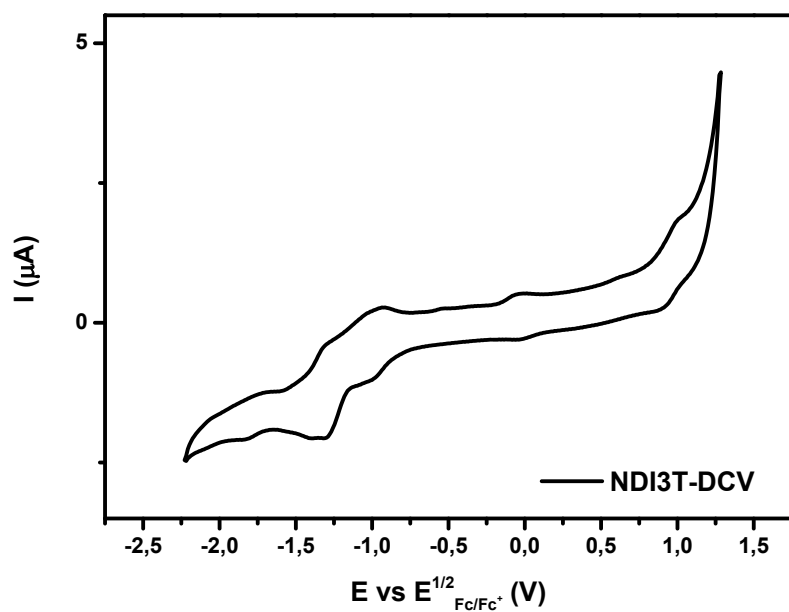

Figure S44. Cyclic voltammetry of NDI3T-DCV and TBAPF6 0.1M in dichloromethane solution.

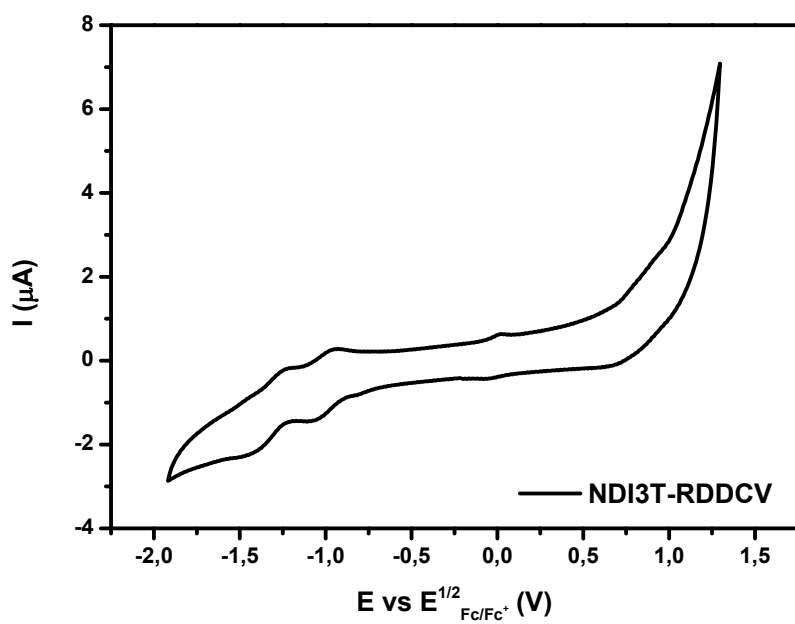

Figure S45. Cyclic voltammetry of NDI3T-RDDCV and TBAPF6 0.1M in dichloromethane solution.

## 6. Spectroelectrochemical measurements

*In-situ* UV-Vis-NIR spectroelectrochemical studies were conducted in dichloromethane solution ( $10^{-3}\text{M}$ ) at room temperature by using  $0.1\text{M}$   $\text{NBu}_4\text{PF}_6$  as supporting electrolyte. The diluted solution was introduced in an optically transparent thin-layer electrochemical (OTTLE) cell from Specac, positioned in the sample compartment of a Varian Cary 5000 Spectrophotometer. The OTTLE cell consists of three electrodes: a Pt gauze used as the working electrode (32 wires per cm), a Pt wire used as the counter electrode, and an Ag wire used as the pseudo-reference electrode. This OTTLE is connected to an EC Epsilon potentiostat which controls on the Cary 5000 spectrophotometer. A C3 epsilon potentiostat from BASi which provides the necessary voltage to reduce or oxidized the samples. was used for the oxidation and reduction processes by using an OTTLE cell from Specac. In this cell, the three-electrode system consists of a Pt gauze as working electrode, a Pt wire as the counter electrode and an Ag wire used as the pseudo-reference electrode. The spectra were collected at constant potential electrolysis with an interval of 15 mV. The electrochemical medium used was 0.1 M tetrabutylammonium hexafluorophosphate in dichloromethane at room temperature with sample concentrations of  $10^{-3}\text{M}$ .

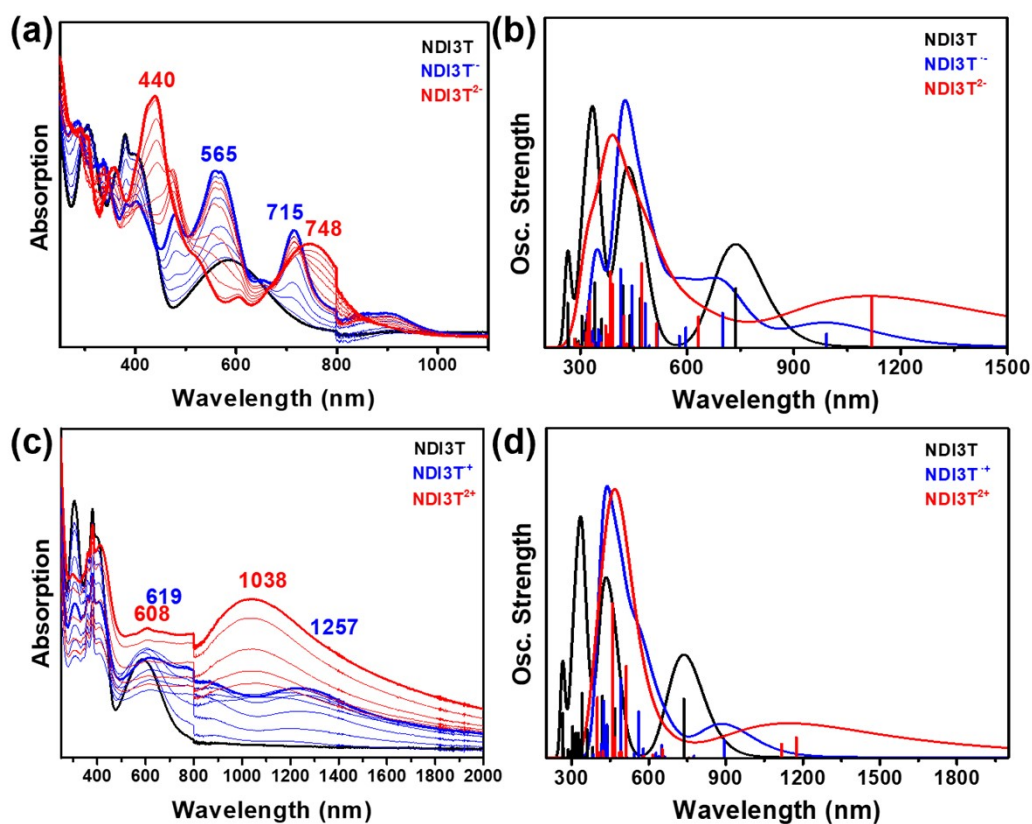

**Figure S46.** (a),(c) UV-Vis-NIR absorption spectra of NIP3T electrochemically reduced and oxidized by progressive increase of the reduction and oxidation potentials, respectively; (b),(d) TDDFT-B3LYP/6-31G\*\* -calculated vertical transition energies.

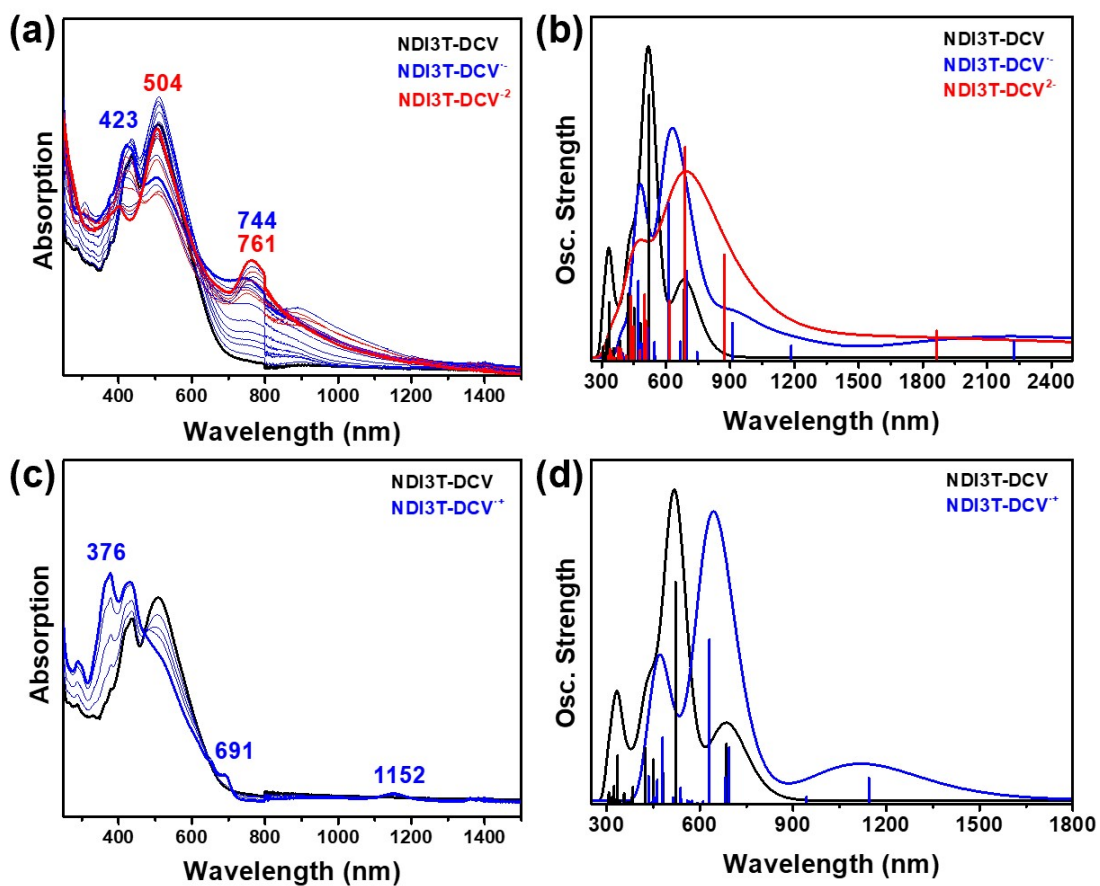

**Figure S47.** (a),(c) UV-Vis-NIR absorption spectra of NIP3T-DCV electrochemically reduced and oxidized by progressive increase of the reduction and oxidation potentials, respectively; (b),(d) TDDFT-B3LYP/6-31G\*\* -calculated vertical transition energies.

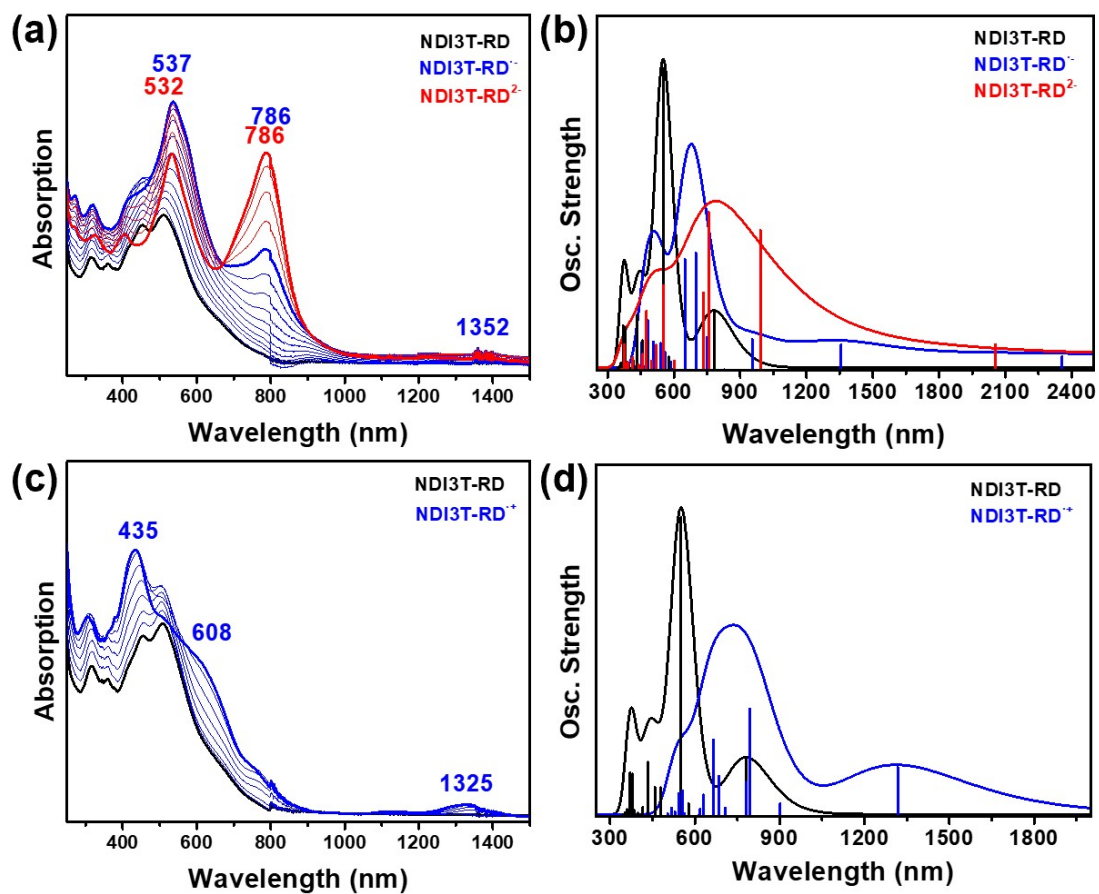

**Figure S48.** (a),(c) UV-Vis-NIR absorption spectra of NIP3T-RD electrochemically reduced and oxidized by progressive increase of the reduction and oxidation potentials, respectively; (b),(d) TDDFT-B3LYP/6-31G\*\*.-calculated vertical transition energies.

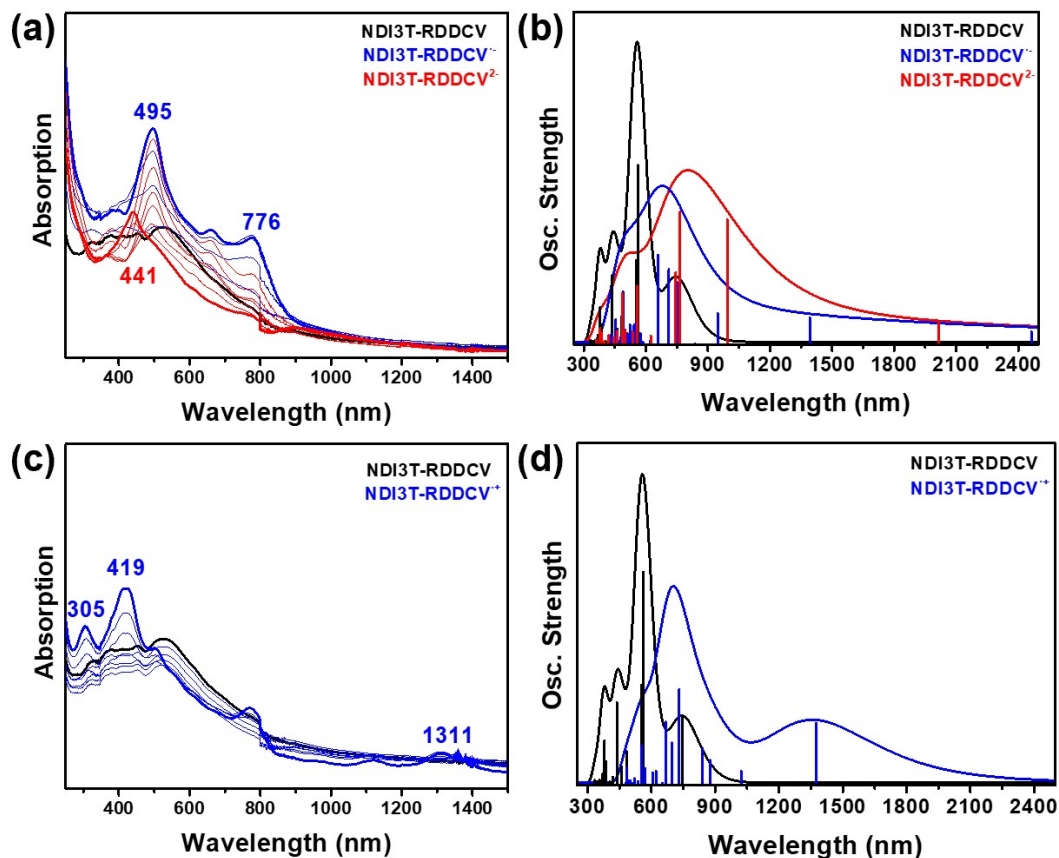

**Figure S49.** (a),(c) UV-Vis-NIR absorption spectra of NIP3T-RDDCV electrochemically reduced and oxidized by progressive increase of the reduction and oxidation potentials, respectively; (b),(d) TDDFT-B3LYP/6-31G\*\* -calculated vertical transition energies.



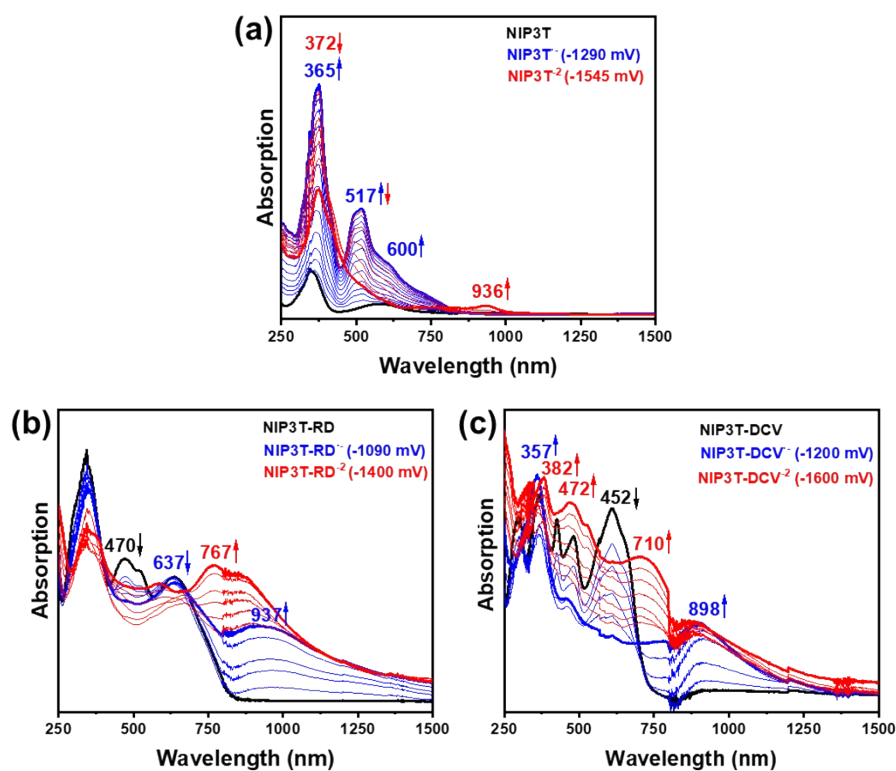

**Figure S50.** UV-Vis-NIR absorption spectra recorded by electrochemical reduction of (a) **NIP3T**, (b) **NIP3T-RD** and (c) **NIP3T-RDCV** in dichloromethane in presence of  $\text{Bu}_4\text{NBF}_4$  as supporting electrolyte within an OTTLE cell.

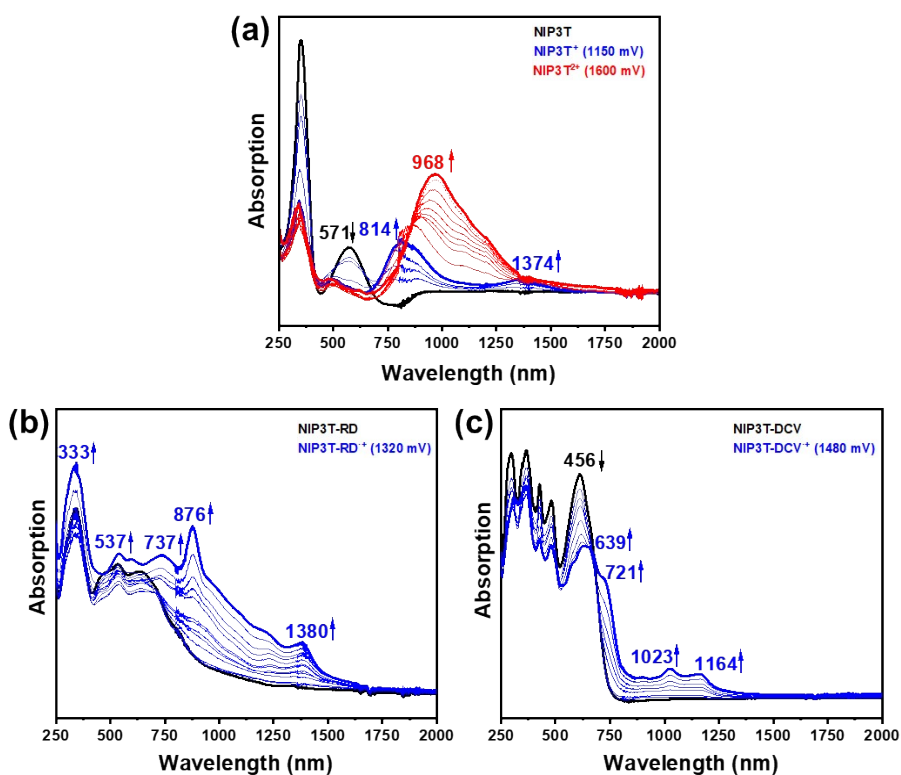

**Figure S51.** UV-Vis-NIR absorption spectra recorded by electrochemical oxidation of (a) **NIP3T**, (b) **NIP3T-RD** and (c) **NIP3T-DCV** in dichloromethane in presence of  $\text{Bu}_4\text{NBF}_4$  as supporting electrolyte within an OTTLE cell.

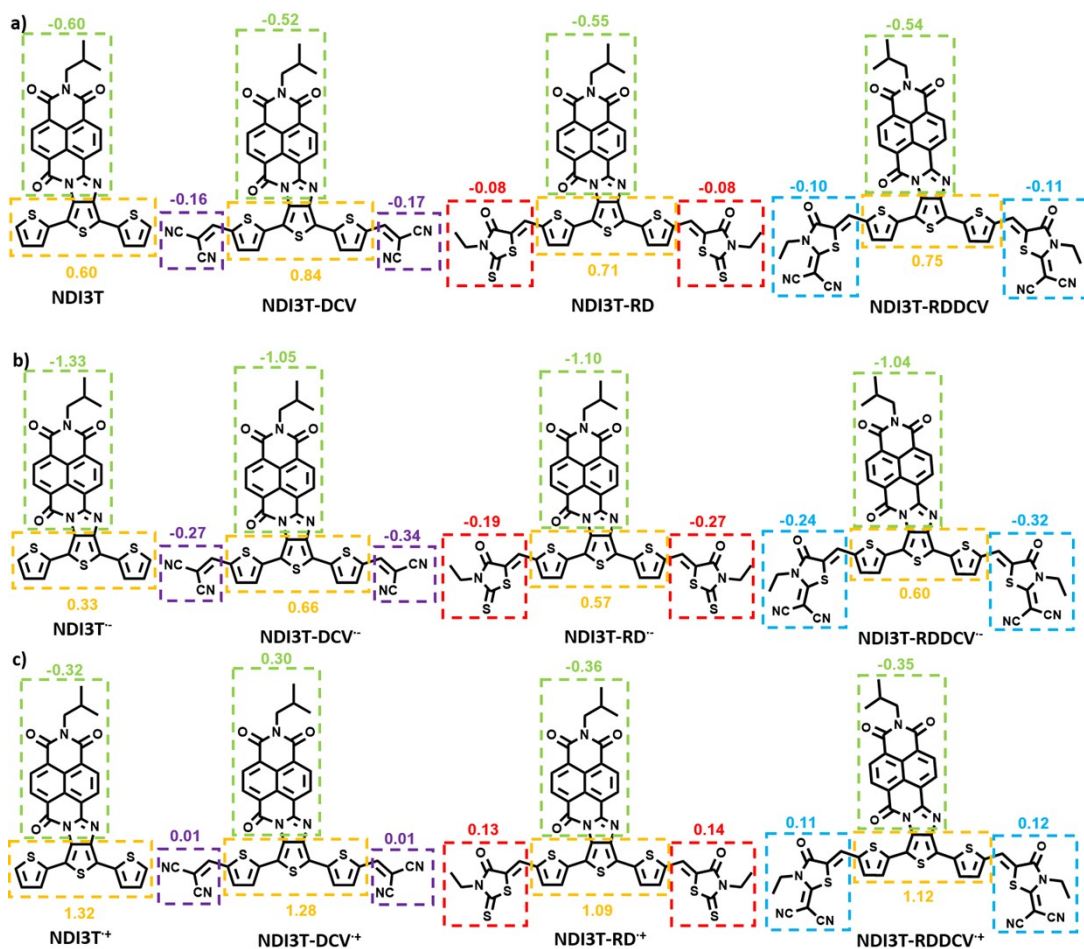

**Figure S52.** B3LYP/6-31G\*\*-charge distributions for NDI3T, NIP3T-DCV, NIP3T-Rd and NIP3T-RDDCV as (a) neutral (b) anion and (c) cation.

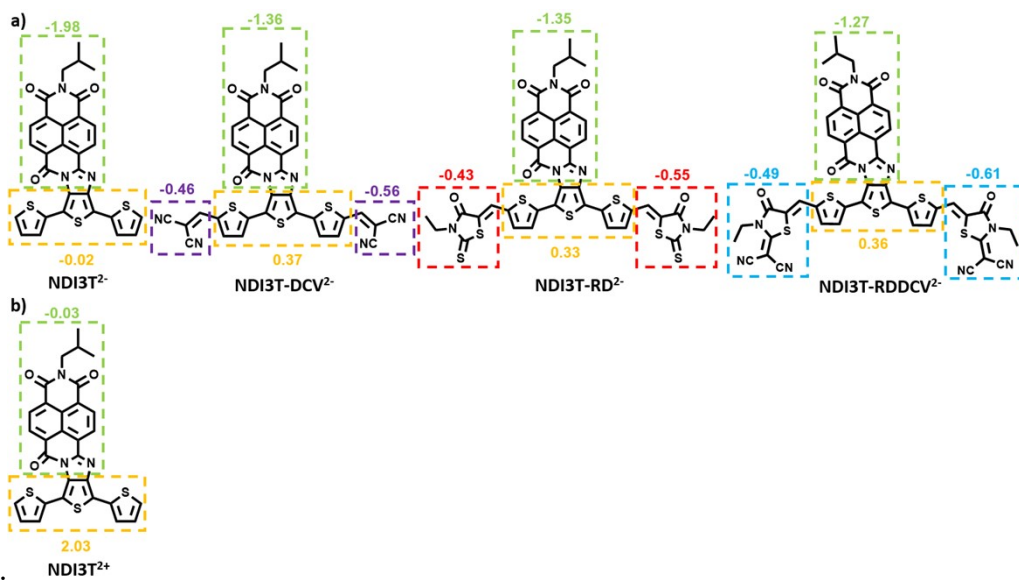

species.

**Figure S53.** B3LYP/6-31G\*\*-charge distributions for NDI3T, NIP3T-DCV, NIP3T-Rd and d) NIP3T-RDDCV as (a) dianion and (b) dication species.

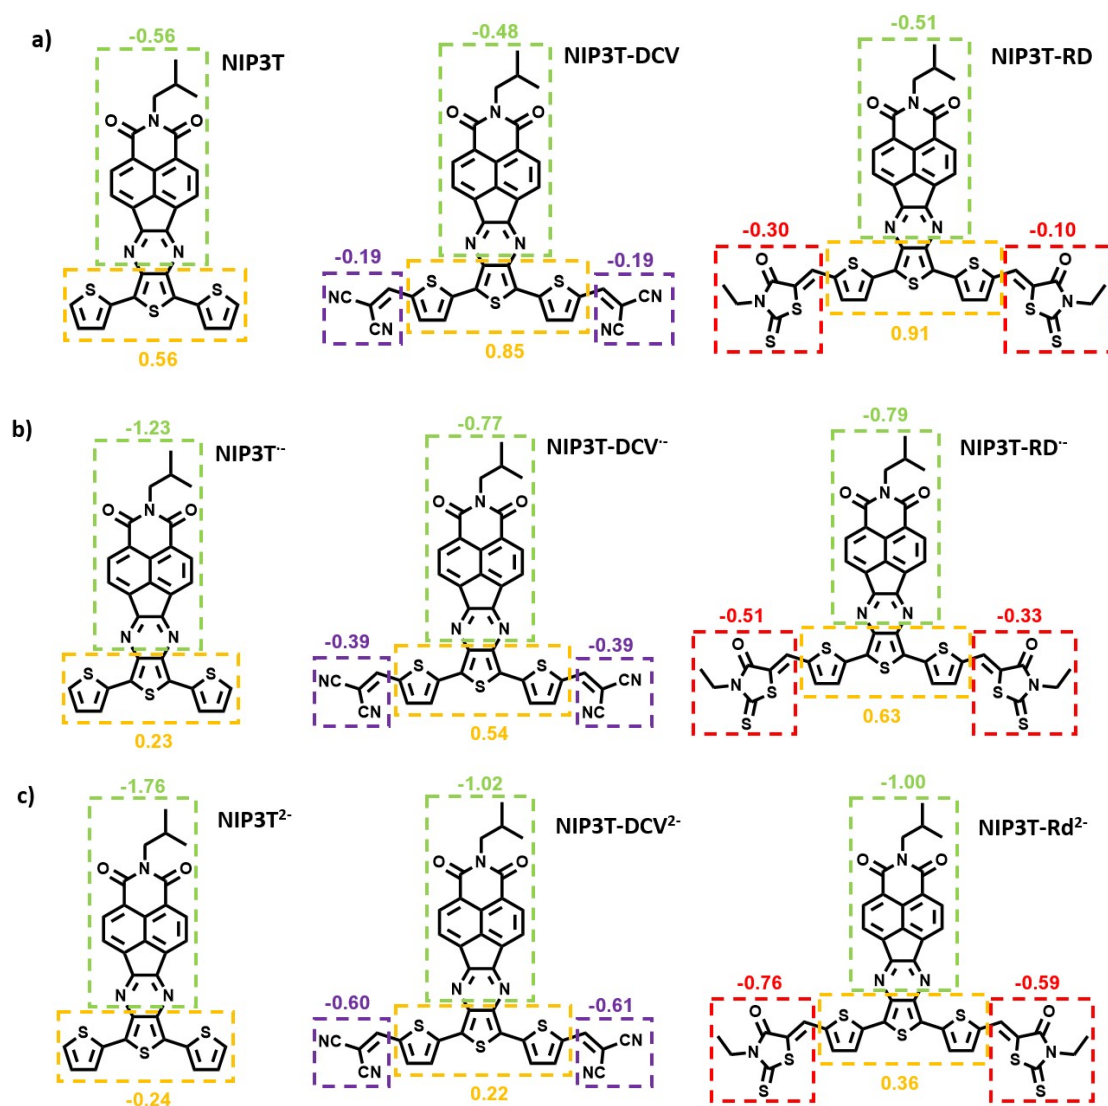

**Figure S54.** B3LYP/6-31G\*\* charge distributions for NIP3T, NIP3T-DCV and NIP3T-Rd as (a) neutral (b) anion and (c) dianion species.

## 7. References.

1. E. A. Weiss, M. J. Tauber, M. A. Ratner and M. R. Wasielewski, *Journal of the American Chemical Society*, 2005, **127**, 6052-6061.
2. A. P. Zoombelt, J. Gilot, M. M. Wienk and R. A. J. Janssen, *Chemistry of Materials*, 2009, **21**, 1663-1669.
3. M. J. Alonso-Navarro, A. Harbuzaru, P. de Echegaray, I. Arrechea-Marcos, A. Harillo-Baños, A. de la Peña, M. M. Ramos, J. T. López Navarrete, M. Campoy-Quiles, R. Ponce Ortiz and J. L. Segura, *Journal of Materials Chemistry C*, 2020, **8**, 15277-15289.
4. C. Lee, W. Yang and R. G. Parr, *Physical Review B*, 1988, **37**, 785-789.
5. A. D. Becke, *The Journal of Chemical Physics*, 1993, **98**, 5648-5652.
6. A. D. Becke, *The Journal of Chemical Physics*, 1993, **98**, 1372-1377.

7. P. C. Hariharan and J. A. Pople, *Theoretica chimica acta*, 1973, **28**, 213-222.
8. W. J. Hehre and W. A. Lathan, *The Journal of Chemical Physics*, 1972, **56**, 5255-5257.
9. G. W. S. M. J. T. Frisch, H. B.; Scuseria, G. E.; Robb, M. A.; Cheeseman, J. R.; Scalmani, G.; Barone, V.; Petersson, G. A.; Nakatsuji, H.; Li, X.; Caricato, M.; Marenich, A. V.; Bloino, J.; Janesko, B. G.; Gomperts, R.; Mennucci, B.; Hratchian, H. P.; Ortiz, J. V.; Izmaylov, A. F.; Sonnenberg, J. L.; Williams-Young, D.; Ding, F.; Lipparini, F.; Egidi, F.; Goings, J.; Peng, B.; Petrone, A.; Henderson, T.; Ranasinghe, D.; Zakrzewski, V. G.; Gao, J.; Rega, N.; Zheng, G.; Liang, W.; Hada, M.; Ehara, M.; Toyota, K.; Fukuda, R.; Hasegawa, J.; Ishida, M.; Nakajima, T.; Honda, Y.; Kitao, O.; Nakai, H.; Vreven, T.; Throssell, K.; Montgomery, J. A., Jr.; Peralta, J. E.; Ogliaro, F.; Bearpark, M. J.; Heyd, J. J.; Brothers, E. N.; Kudin, K. N.; Staroverov, V. N.; Keith, T. A.; Kobayashi, R.; Normand, J.; Raghavachari, K.; Rendell, A. P.; Burant, J. C.; Iyengar, S. S.; Tomasi, J.; Cossi, M.; Millam, J. M.; Klene, M.; Adamo, C.; Cammi, R.; Ochterski, J. W.; Martin, R. L.; Morokuma, K.; Farkas, O.; Foresman, J. B.; Fox, D. J. Gaussian, Inc., Wallingford CT., 2016.
